1 **Field efficacy of guppies and pyriproxyfen (Sumilarv® 2MR) combined with community**

2 **engagement on dengue vectors in Cambodia: a randomized controlled trial**

3 John Christian Hustedt<sup>1,2\*</sup>, Dyna Doum<sup>1</sup>, Vanney Keo<sup>1</sup>, Sokha Ly<sup>3</sup>, BunLeng Sam<sup>3</sup>, Vibol Chan<sup>4</sup>,

4 Neal Alexander<sup>2</sup>, John Bradley<sup>2</sup>, Marco Liverani<sup>2</sup>, Didot Budi Prasetyo<sup>5</sup>, Agus Rachmat<sup>5</sup>,

5 Muhammad Shafique<sup>1</sup>, Sergio Lopes<sup>1</sup>, Leang Rithea<sup>3</sup>, Jeffrey Hii<sup>1</sup>

6 <sup>1</sup> Epidemiology Department, Malaria Consortium, Phnom Penh, Cambodia)

7 <sup>2</sup> MRC Tropical Epidemiology Group, Department of Infectious Disease Epidemiology, London

8 School of Hygiene and Tropical Medicine, London, United Kingdom,

9 <sup>3</sup> Department of Vector Control, Cambodian National Dengue Control Program, Phnom Penh,

10 Cambodia

11 <sup>4</sup> Department of Climate Change and Health, World Health Organization, Phnom Penh,

12 Cambodia

13 <sup>5</sup> Department of Entomology, US Naval Medical Research Unit-2, Phnom Penh, Cambodia

14 \*corresponding author

15 Email: [John.Hustedt@alumni.lshtm.ac.uk](mailto:John.Hustedt@alumni.lshtm.ac.uk)

## 16 Abstract

17 Evidence on the effectiveness of low-cost, sustainable biological vector control tools for *Aedes*  
18 mosquitoes is limited. Therefore, the purpose of this trial is to estimate the impact of guppy fish,  
19 in combination with the use of the larvicide Pyriproxyfen (Sumilarv<sup>®</sup> 2MR), and Communication  
20 for Behavioral Impact (COMBI) activities to reduce entomological indices in Cambodia.

21  
22 In this cluster randomized, controlled superiority trial, 30 clusters comprising of one or more  
23 villages each (with approximately 170 households) will be allocated, in a 1:1:1 ratio, to receive  
24 either a) three interventions (guppies, Sumilarv<sup>®</sup> 2MR, and COMBI activities), b) two  
25 interventions (guppies and COMBI activities), or c) control (standard vector control).

26 Households were invited to participate, and entomology surveys among 40 randomly selected  
27 households per cluster were carried out quarterly. The primary outcome was the population  
28 density of adult female *Aedes* mosquitoes (i.e. number per house) trapped using adult resting  
29 collections. Secondary outcome measures include the House index, Container index, Breteau  
30 index, Pupae Per House, Pupae Per Person, mosquito infection rate, guppy fish coverage,  
31 Sumilarv<sup>®</sup> 2MR coverage, and percentage of respondents with knowledge about *Aedes*  
32 mosquitoes causing dengue. In the primary analysis, adult female *Aedes* density and mosquito  
33 infection rates was aggregated over follow-up time points to give a single rate per cluster. This  
34 was analyzed by negative binomial regression, yielding density ratios.

35  
36 The number of *Aedes* females was reduced by roughly half compared to the control in both the  
37 guppy and PPF arm (Density Ratio (DR)=0.54 [95% CI 0.34-0.85], p=0.0073), and guppy arm  
38 (DR=0.49 [95% CI 0.31-0.77], p=0.0021). The extremely low cost of including guppy rearing in

39 community-based health structures along with the effectiveness demonstrated suggest guppies  
40 should be considered as a vector control tool as long as the benefits outweigh any potential  
41 environmental concerns. PPF was also highly accepted and preferred over current vector control  
42 tools used in Cambodia, however product costs and availability are still unknown.

## 43 Author Summary

44           Dengue is one of the most rapidly spreading mosquito-borne viral diseases in the world,  
45 is caused by bites of infected *Aedes* mosquitoes, and can sometimes lead to death. Cambodia has  
46 one of the highest per-capita incidence rates in Asia. Without a cure or routinely available  
47 efficacious vaccine, dengue control relies largely on reduction and avoidance of mosquitoes. In  
48 Cambodia, dengue mosquito control activities are focused on larviciding with temephos and  
49 pyrethroid based adulticide sprays to which *Aedes* have been shown to be increasingly resistant.  
50 This study was designed to evaluate novel biological vector control tools (guppy fish and a  
51 controlled release larvicidal matrix) utilizing an integrated vector management approach with  
52 community-based methods tailored to the local context. The results indicate that the tools  
53 resulted in a statistically significant reduction in immature and adult *Aedes* mosquito density.  
54 The interventions were accepted by and communities were willing to pay for them. The results  
55 suggest guppies are an ideal vector control tool as long as the benefits outweigh any potential  
56 environmental concerns. PPF was also highly accepted and preferred over current vector control  
57 tools used in Cambodia, however product costs and availability are still unknown.

## 58 Introduction

59           Dengue is the most rapidly spreading mosquito-borne viral disease in the world, and is  
60 caused by bites of infected *Aedes* mosquitoes, principally *Aedes aegypti* [1]. Dengue is  
61 concentrated in the Asian region, which shoulders 70% of the global disease burden. Although a  
62 number of promising vaccine candidates are in preclinical and clinical development [2],  
63 innovative methods of genetic control of mosquitoes are being developed [3–6], however these  
64 interventions are unlikely to eliminate dengue on their own [7]. Therefore, traditional vector  
65 control will remain a key component of dengue control in the short and medium term.

66           In Cambodia, a total of 194,726 dengue cases were reported to the National Dengue  
67 Control Program (NDCP) between 1980 and 2008 [8]. However, the real number of cases and  
68 cost to society is estimated to be many times higher [9,10]. Previous work showed household  
69 water storage jars contained over 80% of *Ae. aegypti* larvae in Cambodia, and these jars became  
70 the main target for dengue vector control activities [11].

71           Since the early 1990s, NDCP has used the larvicide temephos (Abate®) to target large  
72 (200-400L) household water containers as the primary means of vector control [12]. This has  
73 continued despite tests published in 2001, 2007, and 2018 showing resistance of *Ae. aegypti* in  
74 several provinces across Cambodia [12–14]. Khun and Manderson (2007) concluded that  
75 “continued reliance on temephos creates financial and technical problems, while its inappropriate  
76 distribution raises the possibility of larvicide resistance.”[12] These problems led researchers to  
77 consider alternative control methods including chemical and biological substances (pyriproxyfen  
78 (PPF), and *Bacillus thuringiensis israelensis*) [1,12,15,16], jar covers [11], distribution of  
79 larvivoracious copepods and fish [17–19]. The interventions that had the most effective results  
80 included the use of larvivoracious fish and PPF[1,18].

81           The use of a larvivorous guppy fish (*Poecilia reticulata*) was evaluated in 14 Cambodian  
82 villages [17], and subsequently in a larger study of 28 Cambodian villages [18]. Results from the  
83 initial study conducted from 2006-2007 were encouraging as even with low coverage of guppies  
84 (in 56% of eligible containers one year after project commencement) there was a 79% reduction  
85 in *Aedes* infestation compared to the control area. Despite not having guppies, the smaller or  
86 discarded containers in the intervention area had 51% less infestation than those in the control  
87 area, suggesting a community-wide protective effect [17]. These results led the WHO and the  
88 Asian Development Bank (ADB) to fund a larger scale-up in 2010-2011 which included  
89 Communication for Behavioral Impact (COMBI) activities. At the end of the implementation  
90 period, an evaluation found that 88% of water jars, tanks, and drums contained guppy fish,  
91 suggesting successful establishment of breeding sites. In addition, the Container Index (the  
92 percentage of water holding containers infested with *Aedes* larvae or pupae) and the number of  
93 indoor resting adult females in the intervention area were near zero, while the control area had a  
94 Container Index of 30 [18]. Similarly encouraging results were found in Laos as a part of the  
95 same project, although many water containers in the implementation area were too small for  
96 guppy survival. This experience indicates that additional tools beyond larvivorous fish are  
97 required to target smaller water containers as well as hard-to-reach and cryptic breeding sites.

98           One potential solution to increase coverage of water containers in the communities is the  
99 use of PPF, a juvenile hormone analogue that interferes with the metamorphosis of juvenile  
100 *Aedes* mosquitoes, preventing their development. It can be used in small or contaminated  
101 containers unsuitable for larvivorous fish [20]. Studies of the efficacy of PPF in Cambodia  
102 showed inhibition of adult emergence (IE) greater than 87% for six months in 2003 [15], and IE  
103 above 90% for 20 weeks, and above 80% for 34 weeks in 2007 [1]. A slow-release PPF matrix

104 release formulation (Sumilarv® 2MR) has been developed and shown to be effective in  
105 Myanmar [21]. This new product only requires one distribution every six months (the entirety of  
106 the rainy season) so reduces operational costs as compared to temephos or *Bti* which have  
107 residual efficacy of 2-3 months [16,22].

108 Yet the efficacy of these measures, like other vector management approaches in the  
109 communities, is not only dependent on their entomological efficacy, but requires mobilization  
110 and coordination of resources to sustain behavior changes [23]. In particular, a key challenge for  
111 vector control in the communities is how local residents can be involved in and sustain vector  
112 breeding source reduction efforts [18]. Recent reviews indicate that a strong communication and  
113 behavior change approach, such as COMBI, has the potential to support vector management  
114 programs with very good outcomes [24,25]. For example, two new cluster randomized trials  
115 found that educational messages embedded in a community-based vector control approach were  
116 effective at reducing *Ae. aegypti* measured through entomological indices [26,27].

117

#### 118 **Need for a trial**

119 Although there is evidence suggesting the use of guppy fish can be beneficial in dengue  
120 vector control, recent reviews show there has never been a cluster randomized trial to evaluate  
121 their effect on mosquito indices [28]. This trial has the potential to inform the strategic  
122 application of community-based distribution of Pyriproxyfen and larvivorous fish in an outbreak,  
123 during inter-epidemic periods or for broad scale application. This trial will also be the first to our  
124 knowledge to evaluate the widescale use of the new Sumilarv® 2MR product in the field.  
125 Furthermore, they have never been tested in combination. Our study is intended to fill these  
126 knowledge gaps.

127

128 **Hypothesis**

129           This trial aims to demonstrate community effectiveness of guppies, PPF, and COMBI  
130 activities. The main hypotheses are:

- 131 1.       Use of guppies, Sumilarv<sup>®</sup> 2MR and COMBI activities will reduce numbers of *Aedes*  
132 mosquitoes, and their infection rates, more than guppies and COMBI alone, or standard  
133 vector control activities (such as larval control and information and education material  
134 dissemination during outbreaks) as assessed through entomology surveys;
- 135 2.       COMBI activities will improve the community's knowledge, attitudes, and behavior  
136 related to water use and vector borne disease prevention (such as burning or burying  
137 discarded containers, cleaning the environment around the house, and sleeping under a  
138 bednet) as assessed through baseline/endline surveys and Focus Group Discussions  
139 (FGDs);
- 140 3.       Guppies and pyriproxyfen will be acceptable among the target villages as assessed by an  
141 endline survey and FGDs.



## 142 Methods

143 This study followed the Consolidated Standards of Reporting Trials (CONSORT) guidelines [29]  
144 (S1 Table).

### 145 146 **Study design and setting**

147 The study is designed as a cluster randomized, controlled trial with three arms. The study  
148 has 30 clusters in the province of Kampong Cham, where each cluster is a village or group of  
149 villages with on average 170 households (range 49-405) or 757 individuals (range 250-1769).  
150 The rainy season runs from April to November, and the peak dengue season is from May to July.  
151 The clusters were selected in areas which had *Aedes* infestation in the past. To minimize  
152 potential spillover effects, clusters had to be at least 200 meters from the nearest household  
153 outside the cluster since *Ae. aegypti* in this region have an average flight range of 50-100m [30].  
154 Every house within the cluster boundaries was invited to participate in the trial.

### 155 156 **Interventions**

157 Selected villages were randomized into one of three study arms (**Table 1**). Reasons for  
158 selecting the interventions for each arm are described above and in more detail in the study  
159 protocol [31]. The total trial period for the interventions was 11 months (S1 Figure).

160  
161 **Table 1: Interventions randomized to each study arm**

| Intervention                        | Arm 1 | Arm 2 | Arm 3 |
|-------------------------------------|-------|-------|-------|
| Guppy Fish in key containers (>50L) | X     | X     |       |
| COMBI activities                    | X     | X     |       |

|                                                                                    |   |  |  |
|------------------------------------------------------------------------------------|---|--|--|
| Direct PPF application (Sumilarv <sup>®</sup> 2MR) in smaller containers (10-50 L) | X |  |  |
|------------------------------------------------------------------------------------|---|--|--|

162

163 *Guppies*

164 Two guppy fish (*Poecilia reticulata*) were placed into each water container greater than  
165 50L in intervention villages (Arms 1 and 2). This is based on larval consumption of guppies  
166 determined by Seng et al. [17] and past experiences using guppies in vector control in  
167 Cambodia [18]. The guppies were sourced from the original NDCP colony, which was started  
168 from guppies found in a rural waterway near Phnom Penh roughly fifteen years earlier. The  
169 guppy fish were distributed after the baseline activities through a local community network  
170 managed by provincial government authorities [31]. CHWs were provided two jars for rearing.  
171 Each month CHWs conducted visual checks and ensured all their assigned households have  
172 guppies in all large containers and replaced them if necessary.

173

174 *Pyriproxyfen Matrix Release (Sumilarv<sup>®</sup> 2MR)*

175 The product contains pyriproxyfen incorporated in an ethylen copolymer resin disk, and  
176 the PPF is gradually released from the polymer material until it reaches an equilibrium state of  
177 the dissolved active ingredient with that in the matrix formulation [32]. Each device is designed  
178 to provide coverage for 40 L of water, and can be cut into smaller sizes for smaller  
179 containers [31]. PPF devices were distributed to containers of size 10-50 liters at the beginning  
180 of the trial and replaced after 6 months. Additional devices were left at the HC for CHWs to  
181 distribute during their monthly monitoring visit if some were lost or needed to be replaced. The  
182 exceptional safety of PPF is reflected in WHO's statements that it is "unlikely to present acute  
183 hazard in normal use", "pyriproxyfen does not pose a carcinogenic risk to humans", and PPF "is

184 not genotoxic." As a result of its efficacy, The WHO Pesticide Evaluation Scheme has  
185 recommended the use of pyriproxyfen for mosquito control [33]. Animal models suggest a very  
186 favorable mammalian toxicity profile, and extremely low risk for humans using this  
187 product [30].

188

### 189 *Communication for Behavioral Impact Activities*

190 A rapid formative assessment consisting of FGDs and In-Depth Interviews (IDIs)  
191 regarding knowledge, attitudes, and behaviors of community members was completed. The  
192 results formed the basis of well-informed COMBI interventions and were used in a message and  
193 material development workshop held with key community and district stakeholders [31]. Two  
194 days of training were given to CHWs on communication and facilitation skills, roles and  
195 responsibilities, and community participation following which they took the lead role in  
196 conducting health education sessions twice every month in their community [31]. Monthly  
197 meetings were also conducted with CHWs to assess progress, address issues and challenges, and  
198 provide them continuous training.

199

### 200 **Adherence**

201 In order to improve adherence to the intervention protocols, CHWs performed monthly  
202 monitoring checks on each household within the intervention arms, and entomology surveys  
203 recorded the presence or absence of each intervention in containers [31]. Project staff also  
204 randomly visited CHWs and intervention households to confirm the reliability of data provided.

205

### 206 **Primary Outcome Measures**

207           The primary outcome measure is the population density (i.e. number of mosquitoes per  
208 unit of time spent aspirating) of adult female *Aedes* trapped using adult resting collections.

209

## 210 **Secondary Outcome Measures**

211           The secondary outcomes for the trial include:

- 212 1.     Dengue virus infection rate in adult female *Aedes* mosquitoes
- 213 2.     House index (HI): Proportion of houses surveyed positive for *Aedes* larvae and/or pupae  
214         in any water container
- 215 3.     Container index (CI): Proportion of surveyed containers containing *Aedes* larvae and/or  
216         pupae
- 217 4.     Breteau index (BI): Number of containers positive for *Aedes* larvae and/or pupae per 100  
218         houses surveyed
- 219 5.     Pupae Per House (PPH): Number of *Aedes* pupae per household
- 220 6.     Pupae Per Person (PPP): Number of *Aedes* pupae per person
- 221 7.     Guppy fish coverage: proportion of eligible water containers with  $\geq 1$  guppy fish
- 222 8.     Sumilarv<sup>®</sup> 2MR coverage: proportion of eligible water containers with  $\geq 1$  MR resin disc
- 223 9.     Percentage of respondents with knowledge about *Aedes* mosquitoes causing dengue

224

## 225 **Sample Size**

226           The guppy fish and pyriproxyfen interventions were assessed by four entomology surveys.  
227 A sample size of 10 clusters per arm and 40 HHs per cluster for the survey was devised using the  
228 Hemming and Marsh method [34] assuming a mean of 0.1 adult female resting *Aedes* per  
229 household in the intervention arms compared to 0.25 in the control arm for each collection based

230 on previous studies. The households were randomly selected each collection. The intracluster  
231 correlation (ICC) was assumed to be 0.01 based on previous studies [31]. Additionally, a  
232 sensitivity analysis was conducted up to the median value of ICCs for outcome variables (0.03) as  
233 found by an analysis conducted by Campbell et al. [35]. Our analysis determined that ICC values  
234 between 0.01 to 0.03 would have 91 to 75% power, respectively.

235 The impact of COMBI activities in the communities was evaluated through Knowledge,  
236 Attitudes, and Practice (KAP) surveys. A sample size of 10 clusters per arm and 20 HHs per cluster  
237 was devised, again using the Hemming and Marsh method [34], assuming a 22.5% change in KAP  
238 indicators from 40% to 62.5% in intervention villages and no change in the control villages over  
239 the course of one year [31].

240

#### 241 **Allocation**

242 Clusters were randomly assigned with a 1:1:1 allocation through a public randomization  
243 process. Village chiefs from all clusters and HC chiefs from all HCs were invited to a central  
244 point along with local and national authorities, where allocation took place. Allocation  
245 concealment was accomplished by having each cluster representative choose one folded up paper  
246 with a printed label referring to arm one, two, or three.

247

#### 248 **Data collection methods**

249 Data were collected at 0, 4, 8, 12 months post-intervention, unless otherwise mentioned.  
250 The timing was also meant to capture data over different season (e.g. heavy rain, light rain, and  
251 dry seasons). The project employed the following methods:

252

253 *Entomology*

254 A baseline survey was conducted prior to start of interventions. An endline survey was  
255 conducted one year after the baseline. Two additional surveys during the dry season (4 months  
256 post intervention) and light rain (8 months post intervention - peak dengue season) were also  
257 conducted. The survey methodology was developed following the WHO guidelines for  
258 entomological collections [36] and detailed in the study protocol[31]. The survey team also  
259 completed a rapid assessment tool (Premise Condition Index) (PCI) [37] to identify whether the  
260 scores can predict household risk for *Ae. aegypti* infestation [38].

261

262 *Knowledge, Attitudes, and Practices*

263 KAP surveys were conducted at the same time as baseline and endline entomology  
264 surveys [31]. The secondary outcome measure included was whether participants knew dengue is  
265 transmitted by mosquitoes of the genus *Aedes*, rendered in Khmer as “kala”, meaning feline or  
266 tiger.

267

268 *Community Health Worker monthly monitoring*

269 The coverage of guppy fish and PPF Sumilarv<sup>®</sup> 2MR were assessed by ocular inspection  
270 of water containers via entomology surveys and the CHW monthly reporting form as described  
271 in the adherence section. Coverage is expressed as percentage of containers with at least two  
272 guppy fish or one Sumilarv<sup>®</sup> 2MR of the total households or containers examined.

273

274 *Climate*

275           General climate data (rainfall, temperature and humidity) were recorded at one of the  
276 intervention health centers using a rain gauge and a Hobo onset data logger. All villages have  
277 virtually the same climate.

278

#### 279 *Data Management*

280           The first two entomology surveys and the first KAP survey were recorded on paper, and  
281 double data entry was performed using EpiData (EpiData Association, Denmark) by an  
282 experienced data processing company. Due to factors including budget, timeliness, and need for  
283 data cleaning, the subsequent two entomology surveys and final KAP survey were recorded  
284 electronically on Samsung tablets (Samsung Group, South Korea) and uploaded to ONA servers  
285 (ONA, USA).

286

#### 287 **Mosquito flavivirus infection**

288 Adults female *Aedes* mosquitoes were pooled together by cluster with a maximum of 10 per  
289 pool, and an expected minimum infection rate of 3-7% based on other studies [39,40]. Flavivirus  
290 detection in adult female mosquitoes followed the protocol set out by Pierre et al. [41] using a set  
291 of universal oligonucleotide primers. Samples identified as positive for flavivirus were then put  
292 into a rapid assay for detecting and typing dengue viruses [42]. All pools had positive and  
293 negative controls to ensure the tests were working properly.

294

#### 295 *Statistical Methods*

296           All statistical analyses were performed in R version 3.5.0 (Murray Hill, New Jersey) and  
297 Stata® version 14.2 (College Station, Texas).

298

299 Primary Outcome

300 Adult female *Aedes* density was summed over follow-up time points to give a single rate  
301 per cluster. This was analyzed by negative binomial regression using the number of adults as the  
302 response, and the logarithm of the sampling effort (that is, person-time spent aspirating) as an  
303 offset. Hence, this analysis yielded density ratios.

304

305 Secondary Outcomes

306 None of the mosquito pools tested were positive for dengue virus; consequently, the minimum  
307 infection rate was 0%. The most commonly used entomological indexes (BI and PPP) are  
308 reported here, where correlated indices (CI, HI, and PPH) are listed in the supplementary tables  
309 (Table S4.1).

310

311 **Data Monitoring**

312 In accordance with the recommendations of Grant et al., we did not establish a Data  
313 Safety Monitoring Board for this study as it is not a “clinical trial evaluating a therapy with a  
314 mortality or irreversible morbidity endpoint” [43]. However, a Technical Steering Committee  
315 (TSC) was established which met at least every six months and addressed any concerns that  
316 arose [31]. Participants were told to report any adverse events directly to project staff or CHWs  
317 and seek medical attention immediately. CHW monthly monitoring forms include a line to report  
318 any adverse events that have taken place. Any report of harm or adverse events was reported  
319 directly to the TSC.

320



321 **Access to Data**

322 All co-principal investigators and partners were given access to the cleaned data sets  
323 without identifiers, which were stored on the Malaria Consortium Sharepoint site and were  
324 password protected. The final anonymized dataset will be stored in the Cambodian National  
325 Centre for Parasitology, Entomology, and Malaria Control central repository and the final cluster  
326 level dataset used for the analysis in the results section is attached as supporting material (S1  
327 Dataset). Entomological specimens are stored for two years at Malaria Consortium offices  
328 should other researchers be interested in accessing them.

329

330 **Ethical Approval and Consent to participate**

331 Ethical clearance for this trial was received by the Cambodian National Ethics Committee  
332 for Health Research on Oct 9th, 2014 (ethics reference number 0285). Additionally, ethics  
333 approval was received from the London School of Hygiene and Tropical Medicine Observational  
334 / Interventions Research Ethics Committee (ethics reference number 8812). CHWs explained the  
335 trial and received informed consent from the head of the household before providing the  
336 interventions [31]. Those who were illiterate or otherwise could not sign their name were given  
337 the option of giving their thumb print. All village and respondent names were deleted to ensure  
338 no identifying information was included. Data from surveys were stored in a password-protected  
339 computer. All qualitative data were collected in concordance with the guidelines of the Code of  
340 Ethics of the American Anthropological Association (AAA) [44].

## 341 Results

### 342 **Baseline Results**

343 In the baseline results the control arm had a slightly larger number of houses/people than  
344 in intervention arms (Table 2). The sex and age distribution of household heads was similar  
345 between the three arms. The mean number of containers, positive containers, BI, and PPP at  
346 cluster level were all larger in the guppy only arm (arm 2) than others, while the mean number of  
347 adult *Aedes* females per cluster was similar between arms.

|                                                            | Control       | Guppies        | PPF + Guppies |
|------------------------------------------------------------|---------------|----------------|---------------|
| Number of Clusters                                         | 10            | 10             | 10            |
| Number of houses                                           | 2016          | 1641           | 1435          |
| Number of people                                           | 8475          | 7542           | 6700          |
| Number of houses surveyed                                  | 400           | 400            | 400           |
| Percentage of Male Household Heads (Range)                 | 22 (10-45)    | 23 (10-32)     | 20 (10-35)    |
| Median Age of Household Head (Range)                       | 42 (17-78)    | 42 (18-84)     | 45 (18-88)    |
| Mean Number of Containers Per Cluster (Range)              | 154 (121-190) | 186 (160-219)  | 165 (110-213) |
| Mean Number of Positive Containers Per Cluster* (Range)    | 24.7 (18-62)  | 36.5 (18-62)   | 27.7 (11-69)  |
| Mean Breteau Index Per Cluster (Range)                     | 62 (20-115)   | 91 (45-155)    | 69 (28-173)   |
| Mean Pupae Per Person (Range)                              | 0.9 (0.2-2.7) | 4.0 (0.2-17.1) | 1.1 (0.5-2.3) |
| Mean Adult <i>Aedes</i> Female Density Per Cluster (Range) | 10 (1-15)     | 9 (3-24)       | 11 (2-20)     |

\*Positive is defined as having either *Aedes* pupae or larvae in the container.

348

### 349 **Primary Outcome**

350 Over the intervention period, the population density of adult female *Aedes* was  
351 significantly less in both the guppy + PPF arm (Arm 1) (Density Ratio (DR)=0.54 [95% CI  
352 0.34-0.85], p=0.0073), and guppy arm (Arm 2) (DR=0.49 [95% CI 0.31-0.77], p=0.0021)  
353 relative to control (Arm 3). However, the difference between the two intervention arms was not

354 significant (DR=1.10 [95% CI 0.69-1.74], p=0.6901) (Table 3). The mean number of adult *Aedes*  
 355 females was the highest in the light rain season and lowest in the rainy season. (Fig 1).

356 **Fig 1: Box plots showing mean number of adult *Aedes* females per household by arm and**  
 357 **season, October 2015 – October 2016**

358

359 **Secondary Outcomes**

360 No adult female *Aedes* mosquitoes in any arm were found to be positive by PCR for  
 361 dengue virus (n=280 pools). The most commonly used entomological indexes (BI and PPP) are  
 362 reported here, where correlated indices (CI, HI, and PPH) are listed in the supplementary tables  
 363 (S2 Table).

| <b>Table 3: Mean population density of adult female <i>Aedes</i> trapped using adult resting collections per cluster by arm and survey</b> |             |                               |                               |
|--------------------------------------------------------------------------------------------------------------------------------------------|-------------|-------------------------------|-------------------------------|
|                                                                                                                                            | Control     | Guppies                       | Guppies + PPF                 |
| Baseline (Range)                                                                                                                           | 10 (1-15)   | 9 (3-24)                      | 11 (2-20)                     |
| Dry Season (Range)                                                                                                                         | 20 (3-49)   | 11 (3-17)                     | 14 (2-25)                     |
| Light Rain (Range)                                                                                                                         | 75 (17-181) | 29 (4-71)                     | 35 (12-63)                    |
| Heavy Rain (Range)                                                                                                                         | 10 (4-23)   | 12 (2-25)                     | 8 (1-23)                      |
| Total (Range)                                                                                                                              | 35 (3-181)  | 17 (2-71)                     | 19 (1-63)                     |
| Density Ratio (95% CI), p-value*                                                                                                           | 1 (Ref)     | 0.49 (0.31-0.77),<br>p=0.0021 | 0.54 (0.34-0.85),<br>p=0.0073 |
| Density Ratio (95% CI), p-value*                                                                                                           | **          | 1 (Ref)                       | 1.10 (0.69-1.74),<br>p=0.6901 |

\*The ratios do not include the baseline data

\*\*The ratio is not given here as it would be redundant

The trapping time was 10 minutes per house

364

365 *Breteau Index*

366 Over the intervention period, the BI was significantly less in both the guppy + PPF arm  
 367 (Arm 1) (DR=0.64 [95% CI 0.50-0.85], p=0.0016), and guppy arm (Arm 2) (DR=0.63 [95% CI  
 368 0.48-0.82], p=0.0006) relative to control (Arm 3). The difference between the two intervention  
 369 arms was not significant (DR=0.97 [95% CI 0.73-1.27], p=0.7982) (Table 4). The biggest  
 370 difference between arms was seen during the dry and light rain or rainy seasons (Fig 2).

371 **Fig 2: Box plots showing Breteau index by arm and season, October 2015 – October 2016**

372

| <b>Table 4: Immature <i>Aedes</i> indices per cluster by arm and survey</b> |                         |                            |                            |
|-----------------------------------------------------------------------------|-------------------------|----------------------------|----------------------------|
|                                                                             | <b>Breteau Index</b>    |                            |                            |
|                                                                             | Control                 | Guppies                    | Guppies + PPF              |
| Baseline (Range)                                                            | 62 (20-115)             | 91 (45-155)                | 69 (28-173)                |
| Dry Season (Range)                                                          | 88 (18-153)             | 48 (13-93)                 | 54 (15-93)                 |
| Light Rain (Range)                                                          | 130 (73-188)            | 81 (40-150)                | 74 (35-125)                |
| Heavy Rain (Range)                                                          | 58 (20-150)             | 51 (15-105)                | 45 (15-73)                 |
| Total (Range)                                                               | 92 (18-188)             | 60 (13-150)                | 58 (15-125)                |
| Density Ratio (95% CI), p-value*                                            | 1 (ref)                 | 0.65 (0.50-0.85), p=0.0016 | 0.63 (0.48-0.82), p=0.0006 |
| Density Ratio (95% CI), p-value*                                            | **                      | 1 (ref)                    | 0.97 (0.73-1.27), p=0.7982 |
|                                                                             | <b>Pupae Per Person</b> |                            |                            |
|                                                                             | Control                 | Guppies                    | Guppies + PPF              |
| Baseline (Range)                                                            | 0.9 (0.2-2.7)           | 4.0 (0.2-17.1)             | 1.1 (0.5-2.3)              |
| Dry Season (Range)                                                          | 1.0 (0.1-3.3)           | 0.3 (0-0.9)                | 0.7 (0-1.7)                |
| Light Rain (Range)                                                          | 2.2 (0.5-7.0)           | 1.2 (0.1-3.3)              | 0.60 (0-1.4)               |
| Heavy Rain (Range)                                                          | 0.7 (0.1-2.1)           | 0.6 (0.1-2.9)              | 0.7 (0-1.8)                |
| Total (Range)                                                               | 1.3 (0-7.0)             | 0.7 (0-3.3)                | 0.7 (0-1.8)                |
| Density Ratio (95% CI), p-value*                                            | 1 (ref)                 | 0.56 (0.35-0.91), p=0.0193 | 0.52 (0.32-0.84), p=0.0075 |
| Density Ratio (95% CI), p-value*                                            | **                      | 1 (ref)                    | 0.92 (0.60-1.49), p=0.7385 |

\*The ratios do not include the baseline data

\*\*The ratio is not given here as it would be redundant

373

374 *Pupae Per Person*

375 Baseline results show significantly higher PPP in the guppy arm (Arm 2) than the other  
376 arms (Fig 3). Over the intervention period, the PPP was significantly less in both the guppy +  
377 PPF arm (Arm 1) (DR=0.56 [95% CI 0.35-0.91], p=0.0193), and guppy arm (Arm 2) (DR=0.52  
378 [95% CI 0.32-0.84], p=0.0075) relative to control (Arm 3). The difference between the two  
379 intervention arms was not significant (DR=0.92 [95% CI 0.60-1.49], p=0.7385) (Table 4).

380 **Fig 3: Box plots showing pupae per person by arm and season, October 2015 – October**  
381 **2016**

382

383 *Knowledge, Attitudes, and Practice Survey*

384 The secondary outcome related to the KAP survey is reported here, while the full data set  
385 from the KAP survey is in the supplementary files (S2 Appendix). High levels of knowledge that  
386 dengue is transmitted by *Aedes* mosquitoes were reported at baseline among all arms (range  
387 95.5-98%). Endline surveys showed 100% of participants with this knowledge. Ratios of  
388 increased knowledge between baseline and endline were not significantly different between arms  
389 with the guppy + PPF arm (Arm 1) (RR=0.99 [95% CI 0.86-0.1.14], p=0.915), and guppy arm  
390 (Arm 2) (RR=1.01 [95% CI 0.87-1.16], p=0.943) relative to control (Arm 3) (S2 Table).

391

392 *Coverage of Guppy Fish and Sumilarv<sup>®</sup> 2MR*

393 Coverage of guppy fish (proportion of eligible water containers with  $\geq 1$  guppy fish)  
394 before replacement in Arm 2 rose to nearly 80% after one month and stayed close to 70% for  
395 most of the intervention period (Fig 4). However, in Arm 1 PPF coverage (proportion of eligible  
396 water containers with  $\geq 1$  Sumilarv<sup>®</sup> MR) rose to 80% after two months and stayed high until

397 dropping in March, after which continued health education messages increased coverage back to  
398 near 70-80%. Guppy coverage in Arm 1 was notably lower (near 50%) until guppy use was  
399 emphasized in March, after which it increased dramatically and then dropped off back to around  
400 50%.

401 **Fig 4: Coverage of guppies and PPF in intervention villages by month, November 2015 -**  
402 **September 2016**

403

404 *Climate*

405 The average maximum daily temperature in the shade decreased from 34.4° C in the dry  
406 season to 31.3° C in the light rain season. The average relative daily humidity and monthly  
407 rainfall increased from 60.0% and 10.7 millimeters to 75.2% and 139 millimeters from the dry to  
408 light rain season, respectively (Fig 5). The rainy season saw much larger amounts of rainfall  
409 (near 300 millimeters per month) than all other seasons.

410 **Fig 5: Average maximum daily temperature, relative humidity, and rainfall**

411

412 **Adverse Events**

413 No adverse events, harms, or unintended effects were recorded during the trial.

## 414 Discussion

415 Guppies, whether or not in combination with PPF, were able to decrease the number of  
416 *Aedes* females (DR=0.49-0.54) and PPP (DR=0.52-0.56) by roughly half compared to the control  
417 and resulted in approximately 35% decrease in the BI (DR=0.63-0.64). All other entomological  
418 indices also showed similar and statistically significant reductions in intervention arms as  
419 compared to the control. There were no statistical differences identified between the two  
420 intervention arms, however it should be noted that the trial was not powered to detect those  
421 differences. Regardless, the lack of difference between the arms could also be due to coverage.  
422 Guppy coverage was much lower in intervention Arm 1 than in Arm 2 (~50% vs ~80%),  
423 therefore suggesting the use of PPF may have contributed to keeping entomological indicators  
424 similar to those in Arm 2.

425 Although none of the mosquito pools were found to be positive for dengue virus, all the  
426 positive and negative controls performed as expected. Additionally, a model used to simulate the  
427 process of mosquito sampling, pooling, and virus testing and found that mosquito infection rates  
428 commonly underestimate the prevalence of arbovirus infection in mosquito populations [45].  
429 This suggests that in our trial either 1) the minimum infection rate found was the true rate in the  
430 population, 2) there was some degradation of RNA which resulted in untrue rates (despite proper  
431 cold chain management), or 3) the amount of virus in the pools was below the detection  
432 threshold.

433 It was observed that adherence to guppies was high (70-80%) and consistent when only  
434 one intervention requiring behavior change (guppies) was assigned. In the intervention arm with  
435 guppies and PPF adherence to one intervention was highest when focused health education  
436 messages were given on that intervention specifically (e.g. guppy coverage in March was highest

437 when guppy use was emphasized and lowest in December to February when PPF usage was  
438 emphasized). Similar dynamics have been found with the use of other vector control tools. A  
439 recent review concluded that, when applied as a single intervention, temephos was found to be  
440 effective at suppressing entomological indices. However the same effect was not present when  
441 applied in combination with other interventions [46]. This suggests that unfortunately no single  
442 vector control intervention may be enough to reach elimination of dengue and using multiple  
443 interventions which require behavior change may reduce individual intervention effectiveness.  
444 Some studies have suggested combining imperfect vector control with an imperfect medium-  
445 high efficacy vaccine could be more efficacious and cost-effective way to reduce dengue  
446 cases [47,48].

447         The results of the KAP survey showed very high baseline knowledge levels which may  
448 have resulted from the high number of cases in the study site and from previous government-led  
449 anti-dengue efforts in these areas. The knowledge that dengue is transmitted by *Aedes* mosquitos  
450 rose to 100% of respondents by the end of the intervention, however even that was not  
451 statistically significant between baseline and endline surveys. Similarly high levels of  
452 knowledge on other dengue topics was found in the baseline survey and reported earlier [49].  
453 Interestingly, self-reported vector control practices did not match observed practices recorded in  
454 the surveys, nor was a correlation found between knowledge and observed practices either [49].  
455 Therefore, an education campaign regarding dengue prevention in this setting with high  
456 knowledge levels is unlikely to have any significant effect on practices unless it is incorporated  
457 in a more comprehensive strategy for behavioral change (e.g. use of the COMBI method). In  
458 addition, to bridge the knowledge-practice gap, there is a need to create an enabling environment  
459 at the household, community and health facility level to follow the required behaviors. For



460 example, the vector control knowledge will not be enough until they have a continuous supply of  
461 the recommended interventions (e.g. guppies, PPF, *Bti*) in order to follow the recommended  
462 behaviors.

463 In previously reported Focus Group Discussions (FGDs) and In-Depth Interviews (IDIs),  
464 nearly all participants perceived that the interventions resulted in a reduction in *Aedes* mosquitos  
465 (both adults and immatures) and dengue cases [50]. Participants showed high demand for both  
466 interventions (guppies and PPF) and were willing to pay between 100-500 riel (0.03-0.13 USD).  
467 In addition, several participants began rearing guppies in their home for their personal use, for  
468 the children to play with, and to possibly sell in the market. The presence of larvae in the water  
469 despite the use of PPF was a source of concern for some participants, although this was  
470 overcome in most cases with proper health education through health volunteers. Interpersonal  
471 communication through health volunteers was the most preferred method of transmitting  
472 prevention messages. Together the entomological, KAP, and qualitative results suggest that the  
473 interventions were efficacious and accepted by the community.

474 However, there is always a need to balance potential benefits and harms of any  
475 intervention. Following the recent Zika outbreaks in 2015-2016, there were two groups of  
476 ecologists that noticed public health authorities utilizing non-native larvivorous fish (including  
477 guppies) in *Aedes* control [51,52]. Both of these groups wrote opinion pieces that gave three  
478 strong messages; 1) the use of larvivorous fish in vector control is not effective, 2) the chances of  
479 accidental guppy introduction into local ecosystems are large, and 3) that guppies can easily  
480 establish populations and damage these aquatic ecosystems. The first point is contradicted by  
481 studies which were available at the time, as well as by the current trial [17,18,28]. However,  
482 regarding the other points, guppies are indeed known to be highly plastic and acclimate to new

483 environments [53]. For example, as far back as 1963 guppies have been highly effective in *Culex*  
484 control in highly polluted ground pools and waterways in Bangkok, Yangon, and Taipei [54]. In  
485 one study it was postulated that female guppies are capable of routinely establishing new  
486 populations in mesocosms, and that over 80% of these populations persist for at least two  
487 years [55]. Therefore, the key question is what is the ecological impact of guppies being  
488 accidentally released into the environment? Despite the strong statements made in the opinion  
489 pieces, the underlying evidence seems to be weaker than implied with most introductions made  
490 before proper baseline assessments were completed. Studies have shown some effects of guppies  
491 on resident fish densities in lab conditions [56,57] , and nitrogen levels in water [58–60],  
492 however the extent of these effects across the ecosystem - especially in areas where introduction  
493 and naturalization took place many decades ago (such as Cambodia) - are far from settled. A  
494 book on evolutionary ecology of the guppy noted that in regards to the impact of exotic guppies  
495 “the literature is scant, and the area ripe for research” [53]. The author also noted that manner in  
496 which introduced fish species impact native assemblages is incompletely understood, and that  
497 issues such as anthropogenic changes to the habitat, such as rise in water temperature, could  
498 favor introduced over native species [53].

499       Measures available to control programs to mitigate the risks of introduction include;  
500 1) restricting breeding sites to areas which can be locked and controlled by the breeders; 2) only  
501 distributing fish to key containers in at-risk areas and away from lakes and streams); 3) only  
502 distributing male fish to avoid breeding after accidental release by households; or 4) evaluating  
503 which indigenous larvivorous fish exist that have similar predation behaviors to guppies and  
504 consider their use. It should be noted that male guppies have been found to consume less larvae

505 than males (123 per day compared to 74 per day) [17], however that consumption rate was more  
506 than enough to clear the main breeding jars in Cambodia.

507 In addition to concerns on accidental release of guppies to the environment, some lab  
508 experiments have raised the possibility that putting guppies in containers used for drinking water  
509 could increase *Escherichia coli* and other bacteria [61]. However, a recent study (Sidavong et  
510 al., submitted manuscript) found the addition guppy fish in Lao and Cambodia made no  
511 significant difference to high pre-existing baseline levels of contamination. Therefore, the  
512 authors concluded that any contaminating effect may be insignificant when compared with the  
513 potential for reducing dengue fever cases and advocated for the inclusion of advice on safe water  
514 use to be included in any behavior change communication programs for guppy introduction.

515 This study has several limitations. The most important of which is the absence of a  
516 primary outcome directly related to dengue incidence rather than an entomological one. Finding  
517 the appropriate metric to measure disease impact is bedeviled by the effect of human movement  
518 on patterns of transmission, and the pronounced temporal and spatial heterogeneity in  
519 transmission, which will necessitate very large cluster-randomized study designs [62,63]. We  
520 considered passive surveillance for dengue with rapid diagnostic tests in HCs. Although  
521 sensitivity among currently available tests was considered acceptable for routine clinical  
522 diagnostics [64] it was not considered high enough for seroconversion studies and no studies  
523 were identified that had used rapid diagnostics to estimate seroprevalence. Therefore, more  
524 expensive and labor intensive efforts were preferable, such as cohort studies or capture-recapture  
525 methods (which have their own limitations[65]) to estimate the true number of cases, or using a  
526 more sensitive diagnostic tool such as RT-PCR. However, due to budget limitations it was not  
527 possible to employ them. Additionally, unpublished data from a recent cohort study in the

528 proposed districts suggest that, given similar number of cases during this study timeframe, and  
529 the resources available to the current project, there would not be enough statistical power to  
530 show an impact of the likely size on case numbers [31]. Therefore, the endpoint chosen was the  
531 density of adult *Aedes* mosquitoes, which are on the causal pathway to disease.

532         Nevertheless, determining the effect of an entomological outcome on dengue  
533 transmission is difficult. Multiple studies in Cuba have suggested that a BI of greater than five  
534 can be used to predict dengue transmission, although they note that their results can probably not  
535 be extrapolated to areas where dengue transmission is endemic [66,67]. A recent study from Peru  
536 did show a statistically significant association between 12-month longitudinal data on *Aedes*  
537 *aegypti* abundance (1.01-1.30) and categorical immature indices (1.21-1.75) on risk ratios  
538 dengue virus seroconversion (over six months) [66]. However, even the existence of an  
539 association remains less clear across geographies, and what the strength of that association would  
540 be in Cambodia (with much higher incidence rates) remains difficult to quantify. These efforts  
541 are frustrated by the many intersecting factors which determine dengue infection in communities  
542 including the probability of infecting and being infected by a mosquito bite, the duration of  
543 infection, treatment-seeking behavior, the risk of fever, which serotypes are present, acquired  
544 immunity in the host, coverage of interventions and background prevalence of dengue infections.  
545 The availability of quality data for each of these factors is limited in most tropical countries  
546 where the infection rates are highest.

547         Additional entomological limitations include only having one data collection point in  
548 each season, and no measure in the change of parity rate of adult females. The indoor resting  
549 collection of *Aedes* adult mosquitoes is subject to many challenges including: (i) individual  
550 collector performance & efficiency; (ii) density being time dependent; (iii) and housing

551 conditions, architecture, objects, etc. Another possible source of bias is not having data collectors  
552 blind to the intervention; however, in this case it was unavoidable as data collection teams were  
553 able to see the fish in the containers which they sample. Additionally, as these data are being  
554 collected within one province in Cambodia generalizability could be a concern. However, it is  
555 likely that the result of this trial could be generalizable to areas with similar ecology and  
556 mosquito densities within the country and in neighboring countries.

557         In conclusion, the results from this trial indicate that the interventions resulted in a  
558 statistically significant reduction in immature and adult *Aedes* mosquito density when compared  
559 to the control. There were no statistical differences identified between intervention arms,  
560 although lower guppy coverage in intervention arm two suggests that PPF did help keep  
561 mosquito densities low. Data from the KAP and qualitative assessments showed that the  
562 interventions were accepted by communities and that they were willing to pay for them. The  
563 extremely low cost of including guppy rearing in community-based health structures along with  
564 the effectiveness demonstrated here suggests guppies should be considered as a vector control  
565 tool as long as the benefits outweigh any potential environmental concerns. PPF was also highly  
566 accepted and preferred over current vector control tools used in Cambodia, however product  
567 costs and availability are still unknown. The qualitative assessment suggests that a context  
568 specific and well-informed COMBI and community engagement by giving an active role to  
569 communities is the key to the successful dengue control. Additional studies could be done to  
570 confirm these results and explore the effect of the interventions in different ecological conditions.

## 571 References

- 572 1. Seng CM, Setha T, Nealon J, Socheat D, Nathan MB. Six months of *Aedes aegypti* control  
573 with a novel controlled-release formulation of pyriproxyfen in domestic water storage  
574 containers in Cambodia. *Southeast Asian J Trop Med Public Heal.* 2008;39: 822–826.  
575 Available: <http://www.ncbi.nlm.nih.gov/pubmed/19058575>
- 576 2. Vannice KS, Roehrig JT, Hombach J. Next generation dengue vaccines: A review of the  
577 preclinical development pipeline. *Vaccine.* 2015; doi:10.1016/j.vaccine.2015.09.053
- 578 3. Alphey L, Mckemey A, Nimmo D, Oviedo MN, Lacroix R, Matzen K, et al. Genetic  
579 control of *Aedes* mosquitoes. *Pathog Glob Health.* 2013;  
580 doi:10.1179/2047773213Y.0000000095
- 581 4. Franz AWE, Clem RJ, Passarelli AL. Novel genetic and molecular tools for the  
582 investigation and control of dengue virus transmission by mosquitoes. *Current Tropical*  
583 *Medicine Reports.* 2014. doi:10.1007/s40475-013-0007-2
- 584 5. Ye YH, Carrasco AM, Frentiu FD, Chenoweth SF, Beebe NW, van den Hurk AF, et al.  
585 *Wolbachia* reduces the transmission potential of dengue-infected *Aedes aegypti*. *PLoS*  
586 *Negl Trop Dis.* 2015; doi:10.1371/journal.pntd.0003894
- 587 6. Turelli M, Barton NH. Deploying dengue-suppressing *Wolbachia*: Robust models predict  
588 slow but effective spatial spread in *Aedes aegypti*. *Theor Popul Biol.* 2017;  
589 doi:10.1016/j.tpb.2017.03.003
- 590 7. Bowman LR, Donegan S, McCall PJ. Is dengue vector control deficient in effectiveness or  
591 evidence?: systematic review and meta-analysis. *PLoS Negl Trop Dis.* 2016;  
592 doi:10.1371/journal.pntd.0004551
- 593 8. Huy R, Buchy P, Conan A, Ngan C, Ong S, Ali R, et al. National dengue surveillance in

- 594 Cambodia 1980-2008: epidemiological and virological trends and the impact of vector  
595 control. *Bull World Heal Organ.* 2010;88: 650–657. doi:10.2471/BLT.09.073908
- 596 9. Vong S, Goyet S, Ly S, Ngan C, Huy R, Duong V, et al. Under-recognition and reporting  
597 of dengue in Cambodia: A capture-recapture analysis of the National Dengue Surveillance  
598 System. *Epidemiol Infect.* 2012; doi:10.1017/S0950268811001191
- 599 10. Wichmann O, Yoon IK, Vong S, Limkittikul K, Gibbons R V., Mammen MP, et al.  
600 Dengue in Thailand and Cambodia: An assessment of the degree of underrecognized  
601 disease burden based on reported cases. *PLoS Negl Trop Dis.* 2011;  
602 doi:10.1371/journal.pntd.0000996
- 603 11. Seng CM, Setha T, Nealon J, Chantha N, Socheat D, Nathan MB. The effect of long-  
604 lasting insecticidal water container covers on field populations of *Aedes aegypti* (L.)  
605 mosquitoes in Cambodia. *J Vector Ecol.* 2008;33: 333–341. Available:  
606 <http://www.ncbi.nlm.nih.gov/pubmed/19263854>
- 607 12. Khun S, Manderson LH. Abate distribution and dengue control in rural Cambodia. *Acta*  
608 *Trop.* 2007;101: 139–146. doi:10.1016/j.actatropica.2007.01.002
- 609 13. Boyer S, Lopes S, Prasetyo D, Hustedt J, Sarady AS, Doum D, et al. Resistance of *Aedes*  
610 *aegypti* (Diptera: Culicidae) populations to Deltamethrin, Permethrin, and Temephos in  
611 Cambodia. *Asia-Pacific J Public Heal.* 2018; doi:10.1177/1010539517753876
- 612 14. Polson KA, Curtis C, Seng CM, Olson JG, Chantha N, Rawlins SC. Susceptibility of two  
613 cambodian population of *Aedes aegypti* mosquito larvae to temephos during 2001. *Dengue*  
614 *Bull.* 2001;25: 79–83.
- 615 15. Seng CM, Setha T, Chanta N, Socheat D, Guillet P, Nathan MB. Inhibition of adult  
616 emergence of *Aedes aegypti* in simulated domestic water-storage containers by using a

- 617 controlled-release formulation of pyriproxyfen. *J Am Mosq Control Assoc.* United States;  
618 2006;22: 152–154. doi:10.2987/8756-971X(2006)22[152:IOAEOA]2.0.CO;2
- 619 16. Setha T, Chantha N, Socheat D. Efficacy of *Bacillus thuringiensis israelensis*, VectoBac  
620 WG and DT, formulations against dengue mosquito vectors in cement potable water jars  
621 in Cambodia. *Southeast Asian J Trop Med Public Heal.* 2007/06/02. 2007;38: 261–268.
- 622 17. Seng CM, Setha T, Nealon J, Socheat D, Chantha N, Nathan MB, et al. Community-based  
623 use of the larvivorous fish *Poecilia reticulata* to control the dengue vector *Aedes aegypti* in  
624 domestic water storage containers in rural Cambodia. *J Vector Ecol.* 2008/08/14. 2008;33:  
625 139–144. doi:10.3376/1081-1710(2008)33[139:CUOTLF]2.0.CO;2
- 626 18. World Health Organization. Managing regional public goods for health: community-based  
627 dengue vector control [Internet]. Mandaluyong City, Philippines; 2013. Available:  
628 [https://www.adb.org/sites/default/files/publication/30167/community-based-dengue-](https://www.adb.org/sites/default/files/publication/30167/community-based-dengue-vector-control.pdf)  
629 [vector-control.pdf](https://www.adb.org/sites/default/files/publication/30167/community-based-dengue-vector-control.pdf)
- 630 19. Woosome K. Tiny predator has big role curbing dengue. *The Cambodia Daily.* 2004.  
631 Available: [https://www.cambodiadaily.com/archives/tiny-predator-has-big-role-curbing-](https://www.cambodiadaily.com/archives/tiny-predator-has-big-role-curbing-dengue-37552/)  
632 [dengue-37552/](https://www.cambodiadaily.com/archives/tiny-predator-has-big-role-curbing-dengue-37552/)
- 633 20. World Health Organization. Report of the fourth WHOPES working group meeting.  
634 Review of IR3535, KBR3023, (RS)-methoprene 20% EC and pyriproxyfen 0.5% GR.  
635 [Internet]. Geneva: World Health Organization; 2000. Available:  
636 <https://apps.who.int/iris/handle/10665/66683>
- 637 21. Sai-Zaw-Min-Oo, Sein-Thaung, Yan-Naung-Maung-Maung, Khin-Myo-Aye, Zar-Zar-  
638 Aung, Hlaing-Myat-Thu, et al. Effectiveness of a novel long-lasting pyriproxyfen  
639 larvicide (SumiLarv®2MR) against *Aedes* mosquitoes in schools in Yangon, Myanmar.



- 640 Parasites and Vectors. 2018; doi:10.1186/s13071-017-2603-9
- 641 22. Suaya JA, Shepard DS, Chang MS, Caram M, Hoyer S, Socheat D, et al. Cost-  
642 effectiveness of annual targeted larviciding campaigns in Cambodia against the dengue  
643 vector *Aedes aegypti*. Trop Med Int Heal. 2007/09/19. 2007;12: 1026–1036.  
644 doi:10.1111/j.1365-3156.2007.01889.x
- 645 23. Azmawati MN, Aniza I, Ali M. Evaluation of Communication for Behavioral Impact  
646 (COMBI) program in dengue prevention: a qualitative and quantitative study in Selangor,  
647 Malaysia. Iran J Public Heal. 2013;42: 538–539. Available:  
648 <http://www.ncbi.nlm.nih.gov/pubmed/23802114>
- 649 24. Al-Muhandis N, Hunter PR. The value of educational messages embedded in a  
650 community-based approach to combat dengue fever: a systematic review and meta  
651 regression analysis. PLoS Negl Trop Dis. 2011/09/03. 2011;5: e1278.  
652 doi:10.1371/journal.pntd.0001278
- 653 25. Heintze C, Velasco Garrido M, Kroeger A. What do community-based dengue control  
654 programmes achieve? A systematic review of published evaluations. Trans R Soc Trop  
655 Med Hyg. 2006/11/07. 2007;101: 317–325. doi:10.1016/j.trstmh.2006.08.007
- 656 26. Vanlerberghe V, Toledo ME, Rodriguez M, Gomez D, Baly A, Benitez JR, et al.  
657 Community involvement in dengue vector control: cluster randomised trial. MEDICC  
658 Rev. 2010/04/15. 2010;12: 41–47.
- 659 27. Castro M, Sanchez L, Perez D, Carbonell N, Lefevre P, Vanlerberghe V, et al. A  
660 community empowerment strategy embedded in a routine dengue vector control  
661 programme: a cluster randomised controlled trial. Trans R Soc Trop Med Hyg.  
662 2012/04/03. 2012;106: 315–321. doi:10.1016/j.trstmh.2012.01.013

- 663 28. Han WW, Lazaro A, McCall PJ, George L, Runge-Ranzinger S, Toledo J, et al. Efficacy  
664 and community effectiveness of larvivorous fish for dengue vector control. *Trop Med Int*  
665 *Heal.* 2015;20: 1239–1256. doi:10.1111/tmi.12538
- 666 29. Campbell MK, Piaggio G, Elbourne DR, Altman DG. Consort 2010 statement: Extension  
667 to cluster randomised trials. *BMJ.* 2012; doi:10.1136/bmj.e5661
- 668 30. Harrington LC, Scott TW, Lerdtusnee K, Coleman RC, Costero A, Clark GG, et al.  
669 Dispersal of the dengue vector *Aedes aegypti* within and between rural communities. *Am J*  
670 *Trop Med Hyg.* 2005;72: 209–220. Available:  
671 <http://www.ncbi.nlm.nih.gov/pubmed/15741559>
- 672 31. Hustedt J, Doum D, Keo V, Ly S, Sam BL, Chan V, et al. Determining the efficacy of  
673 guppies and pyriproxyfen (Sumilarv® 2MR) combined with community engagement on  
674 dengue vectors in Cambodia: Study protocol for a randomized controlled trial. *Trials.*  
675 2017; doi:10.1186/s13063-017-2105-2
- 676 32. World Health Organization. WHO Specifications and Evaluations for Public Health  
677 Pesticides - Pyriproxyfen [Internet]. 2017. Available:  
678 [https://www.who.int/whopes/quality/Pyriproxyfen\\_eval\\_specs\\_WHO\\_July\\_2017.pdf](https://www.who.int/whopes/quality/Pyriproxyfen_eval_specs_WHO_July_2017.pdf)
- 679 33. World Health Organization. Report of the Twentieth WHOPES Working Group Meeting  
680 [Internet]. 2017. Available:  
681 [https://apps.who.int/iris/bitstream/handle/10665/258921/WHO-HTM-NTD-WHOPES-](https://apps.who.int/iris/bitstream/handle/10665/258921/WHO-HTM-NTD-WHOPES-2017.04-eng.pdf)  
682 [2017.04-eng.pdf](https://apps.who.int/iris/bitstream/handle/10665/258921/WHO-HTM-NTD-WHOPES-2017.04-eng.pdf)
- 683 34. Hemming K MJ. A menu-driven facility for sample-size calculations in cluster  
684 randomized controlled trials. *Stata J.* 2013;13: 114–135.
- 685 35. Campbell MK, Fayers PM, Grimshaw JM. Determinants of the intracluster correlation

- 686 coefficient in cluster randomized trials: the case of implementation research. Clin Trials.  
687 2005;2: 99–107. Available: <http://www.ncbi.nlm.nih.gov/pubmed/16279131>
- 688 36. World Health Organization. Dengue: guidelines for diagnosis, treatment, prevention, and  
689 control. Spec Program Res Train Trop Dis. Geneva: World Health Organization; 2009;  
690 147. doi:WHO/HTM/NTD/DEN/2009.1
- 691 37. Tun-Lin W, Kay BH, Barnes A. The Premise Condition Index: a tool for streamlining  
692 surveys of *Aedes aegypti*. Am J Trop Med Hyg. 1995/12/01. 1995;53: 591–594.  
693 Available: <https://www.ncbi.nlm.nih.gov/pubmed/8561259>
- 694 38. Hustedt J, Doum D, Keo V, Ly S, Sam B, Chan V, et al. Ability of the Premise Condition  
695 Index to Identify Premises with Adult and Immature *Aedes* Mosquitoes in Kampong  
696 Cham, Cambodia. Am J Trop Med Hyg. 2020; doi:10.4269/ajtmh.19-0453
- 697 39. Sule WF, Oluwayelu DO. Analysis of culex and aedes mosquitoes in southwestern  
698 Nigeria revealed no west Nile virus activity. Pan Afr Med J. 2016;  
699 doi:10.11604/pamj.2016.23.116.7249
- 700 40. Cevallos V, Ponce P, Waggoner JJ, Pinsky BA, Coloma J, Quiroga C, et al. Zika and  
701 Chikungunya virus detection in naturally infected *Aedes aegypti* in Ecuador. Acta Trop.  
702 2018; doi:10.1016/j.actatropica.2017.09.029
- 703 41. Pierre V, Drouet MT, Deubel V. Identification of mosquito-borne flavivirus sequences  
704 using universal primers and reverse transcription/polymerase chain reaction. Res Virol.  
705 1994; doi:10.1016/S0923-2516(07)80011-2
- 706 42. Lanciotti RS, Calisher CH, Gubler DJ, Chang GJ, Vorndam A V. Rapid detection and  
707 typing of dengue viruses from clinical samples by using reverse transcriptase-polymerase  
708 chain reaction. J Clin Microbiol. 1992;

- 709 43. Grant AM, Altman DG, Babiker AB, Campbell MK, Clemens FJ, Darbyshire JH, et al.  
710 Issues in data monitoring and interim analysis of trials. *Heal Technol Assess.* 2005;9: 1–  
711 238, iii–iv. Available: <http://www.ncbi.nlm.nih.gov/pubmed/15763038>
- 712 44. American Anthropological Association. Principles of Professional Responsibility  
713 [Internet]. 2012. Available: <http://ethics.aaanet.org/category/statement/>
- 714 45. Bustamante DM, Lord CC. Sources of error in the estimation of mosquito infection rates  
715 used to assess risk of arbovirus transmission. *Am J Trop Med Hyg.* 2010;  
716 doi:10.4269/ajtmh.2010.09-0323
- 717 46. George L, Lenhart A, Toledo J, Lazaro A, Han WW, Velayudhan R, et al. Community-  
718 effectiveness of temephos for dengue vector control: a systematic literature review. *PLoS*  
719 *Negl Trop Dis.* 2015;9: e0004006. doi:10.1371/journal.pntd.0004006
- 720 47. Fitzpatrick C, Haines A, Bangert M, Farlow A, Hemingway J, Velayudhan R. An  
721 economic evaluation of vector control in the age of a dengue vaccine. *PLoS Negl Trop*  
722 *Dis.* 2017; doi:10.1371/journal.pntd.0005785
- 723 48. Christofferson RC, Mores CN. A role for vector control in dengue vaccine programs.  
724 *Vaccine.* 2015; doi:10.1016/j.vaccine.2015.09.114
- 725 49. Kumaran E, Doum D, Keo V, Sokha L, Sam BL, Chan V, et al. Dengue knowledge,  
726 attitudes and practices and their impact on community-based vector control in rural  
727 Cambodia. *PLoS Negl Trop Dis.* 2018; doi:10.1371/journal.pntd.0006268
- 728 50. Shafique M, Lopes S, Doum D, Keo V, Sokha L, Sam B, et al. Implementation of guppy  
729 fish (*Poecilia reticulata*), and a novel larvicide (Pyriproxyfen) product (Sumilarv 2MR)  
730 for dengue control in Cambodia: A qualitative study of acceptability, sustainability and  
731 community engagement. *PLoS Negl Trop Dis.* 2019;13: e0007907.

- 732 doi:10.1371/journal.pntd.0007907
- 733 51. El-Sabaawi RW, Frauendorf TC, Marques PS, Mackenzie RA, Manna LR, Mazzoni R, et  
734 al. Biodiversity and ecosystem risks arising from using guppies to control mosquitoes.  
735 *Biology letters*. 2016. doi:10.1098/rsbl.2016.0590
- 736 52. Azevedo-Santos VM, Vitule JRS, Pelicice FM, García-Berthou E, Simberloff D.  
737 Nonnative fish to control *Aedes* mosquitoes: A controversial, harmful tool. *BioScience*.  
738 2017. doi:10.1093/biosci/biw156
- 739 53. Magurran AE. *Evolutionary ecology: the Trinidadian guppy*. Oxford Series in Ecology  
740 and Evolution. 2005. doi:10.1093/acprof
- 741 54. Bay EC, Self LS. Observations of the guppy, *Poecilia reticulata* Peters, in *Culex pipiens*  
742 *fatigans* breeding sites in Bangkok, Rangoon, and Taipei. *Bull World Health Organ*. 1972;
- 743 55. Deacon AE, Ramnarine IW, Magurran AE. How reproductive ecology contributes to the  
744 spread of a globally invasive fish. *PLoS One*. 2011; doi:10.1371/journal.pone.0024416
- 745 56. Walsh MR, Reznick DN. Influence of the indirect effects of guppies on life-history  
746 evolution in *rivulus hartii*. *Evolution (N Y)*. 2010; doi:10.1111/j.1558-5646.2009.00922.x
- 747 57. Walsh MR, Reznick DN. Experimentally induced life-history evolution in a killifish in  
748 response to the introduction of guppies. *Evolution (N Y)*. 2011; doi:10.1111/j.1558-  
749 5646.2010.01188.x
- 750 58. Holitzki TM, MacKenzie RA, Wiegner TN, McDermid KJ. Differences in ecological  
751 structure, function, and native species abundance between native and invaded Hawaiian  
752 streams. *Ecol Appl*. 2013; doi:10.1890/12-0529.1
- 753 59. El-Sabaawi RW, Marshall MC, Bassar RD, López-Sepulcre A, Palkovacs EP, Dalton C.  
754 Assessing the effects of guppy life history evolution on nutrient recycling: From

- 755 experiments to the field. *Freshw Biol.* 2015; doi:10.1111/fwb.12507
- 756 60. Collins SM, Thomas SA, Heatherly T, MacNeill KL, Leduc AOHC, López-Sepulcre A, et  
757 al. Fish introductions and light modulate food web fluxes in tropical streams: A whole-  
758 ecosystem experimental approach. *Ecology.* 2016; doi:10.1002/ecy.1530
- 759 61. Chadee DD. Bacterial pathogens isolated from guppies (*poecilia reticulata*) used to control  
760 *Aedes aegypti* in trinidad. *Trans R Soc Trop Med Hyg.* 1992; doi:10.1016/0035-  
761 9203(92)90194-H
- 762 62. Van Breukelen GJP, Candel MJJM. Calculating sample sizes for cluster randomized trials:  
763 We can keep it simple and efficient! *J Clin Epidemiol.* 2012;  
764 doi:10.1016/j.jclinepi.2012.06.002
- 765 63. Hayes RJ, Moulton LH. *Cluster Randomized Trials.* Florida: Chapman & Hall; 2009.
- 766 64. Hunsperger EA, Yoksan S, Buchy P, Nguyen VC, Sekaran SD, Enria DA, et al.  
767 Evaluation of commercially available diagnostic tests for the detection of dengue virus  
768 NS1 antigen and anti-dengue virus IgM antibody. *PLoS Negl Trop Dis.* 2014;8: e3171.  
769 doi:10.1371/journal.pntd.0003171
- 770 65. Tilling K. Capture-recapture methods--useful or misleading? *Int J Epidemiol.* 2001;30:  
771 12–14. Available: <http://www.ncbi.nlm.nih.gov/pubmed/11171841>
- 772 66. Sanchez L, Vanlerberghe V, Alfonso L, Marquetti MDC, Guzman MG, Bisset J, et al.  
773 *Aedes aegypti* larval indices and risk for dengue epidemics. *Emerg Infect Dis.* 2006;  
774 doi:10.3201/eid1205.050866
- 775 67. Sanchez L, Cortinas J, Pelaez O, Gutierrez H, Concepción D, Van Der Stuyft P. Breteau  
776 Index threshold levels indicating risk for dengue transmission in areas with low *Aedes*  
777 infestation. *Trop Med Int Heal.* 2010; doi:10.1111/j.1365-3156.2009.02437.x

778 Supporting information captions

779

780 S1 Figure: CONSORT 2010 Flow Diagram

781 S1 Table: CONSORT 2010 checklist of information to include when reporting a randomized trial

782 S2 Table: Remaining Secondary Outcome Tables

783 S1 Dataset: Entomology data at cluster level used for analysis

Figure 1: Box plots showing mean number of adult *Aedes* females per household by arm and season, October 2015 – October 2016

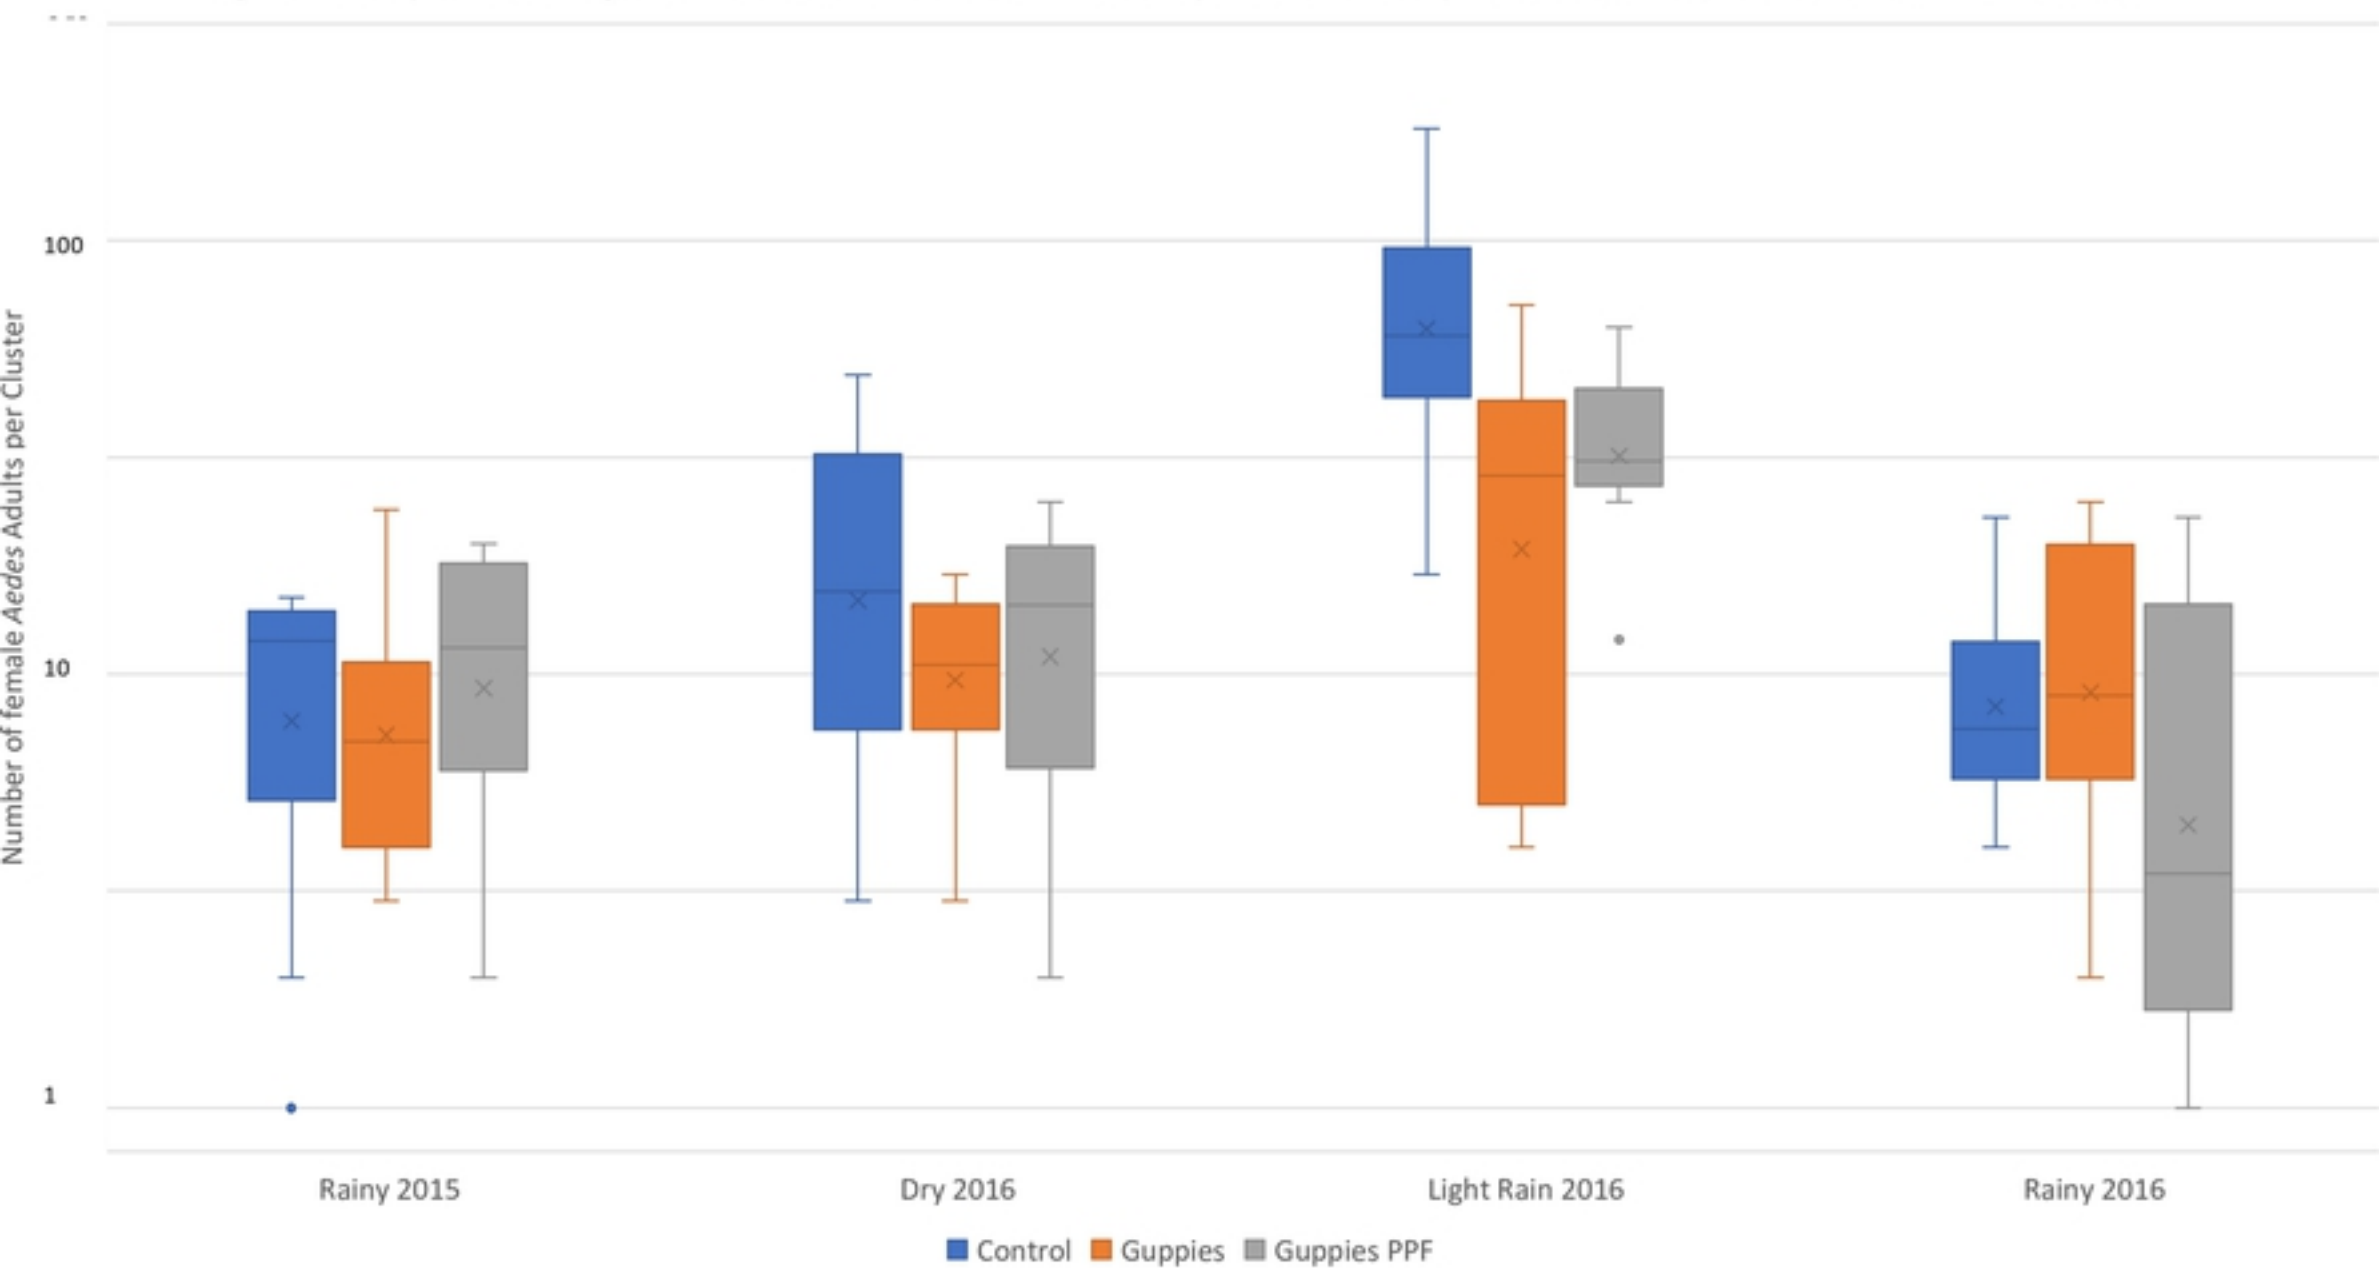

Figure 1



Figure 5: Average maximum daily temperature, relative humidity, and rainfall

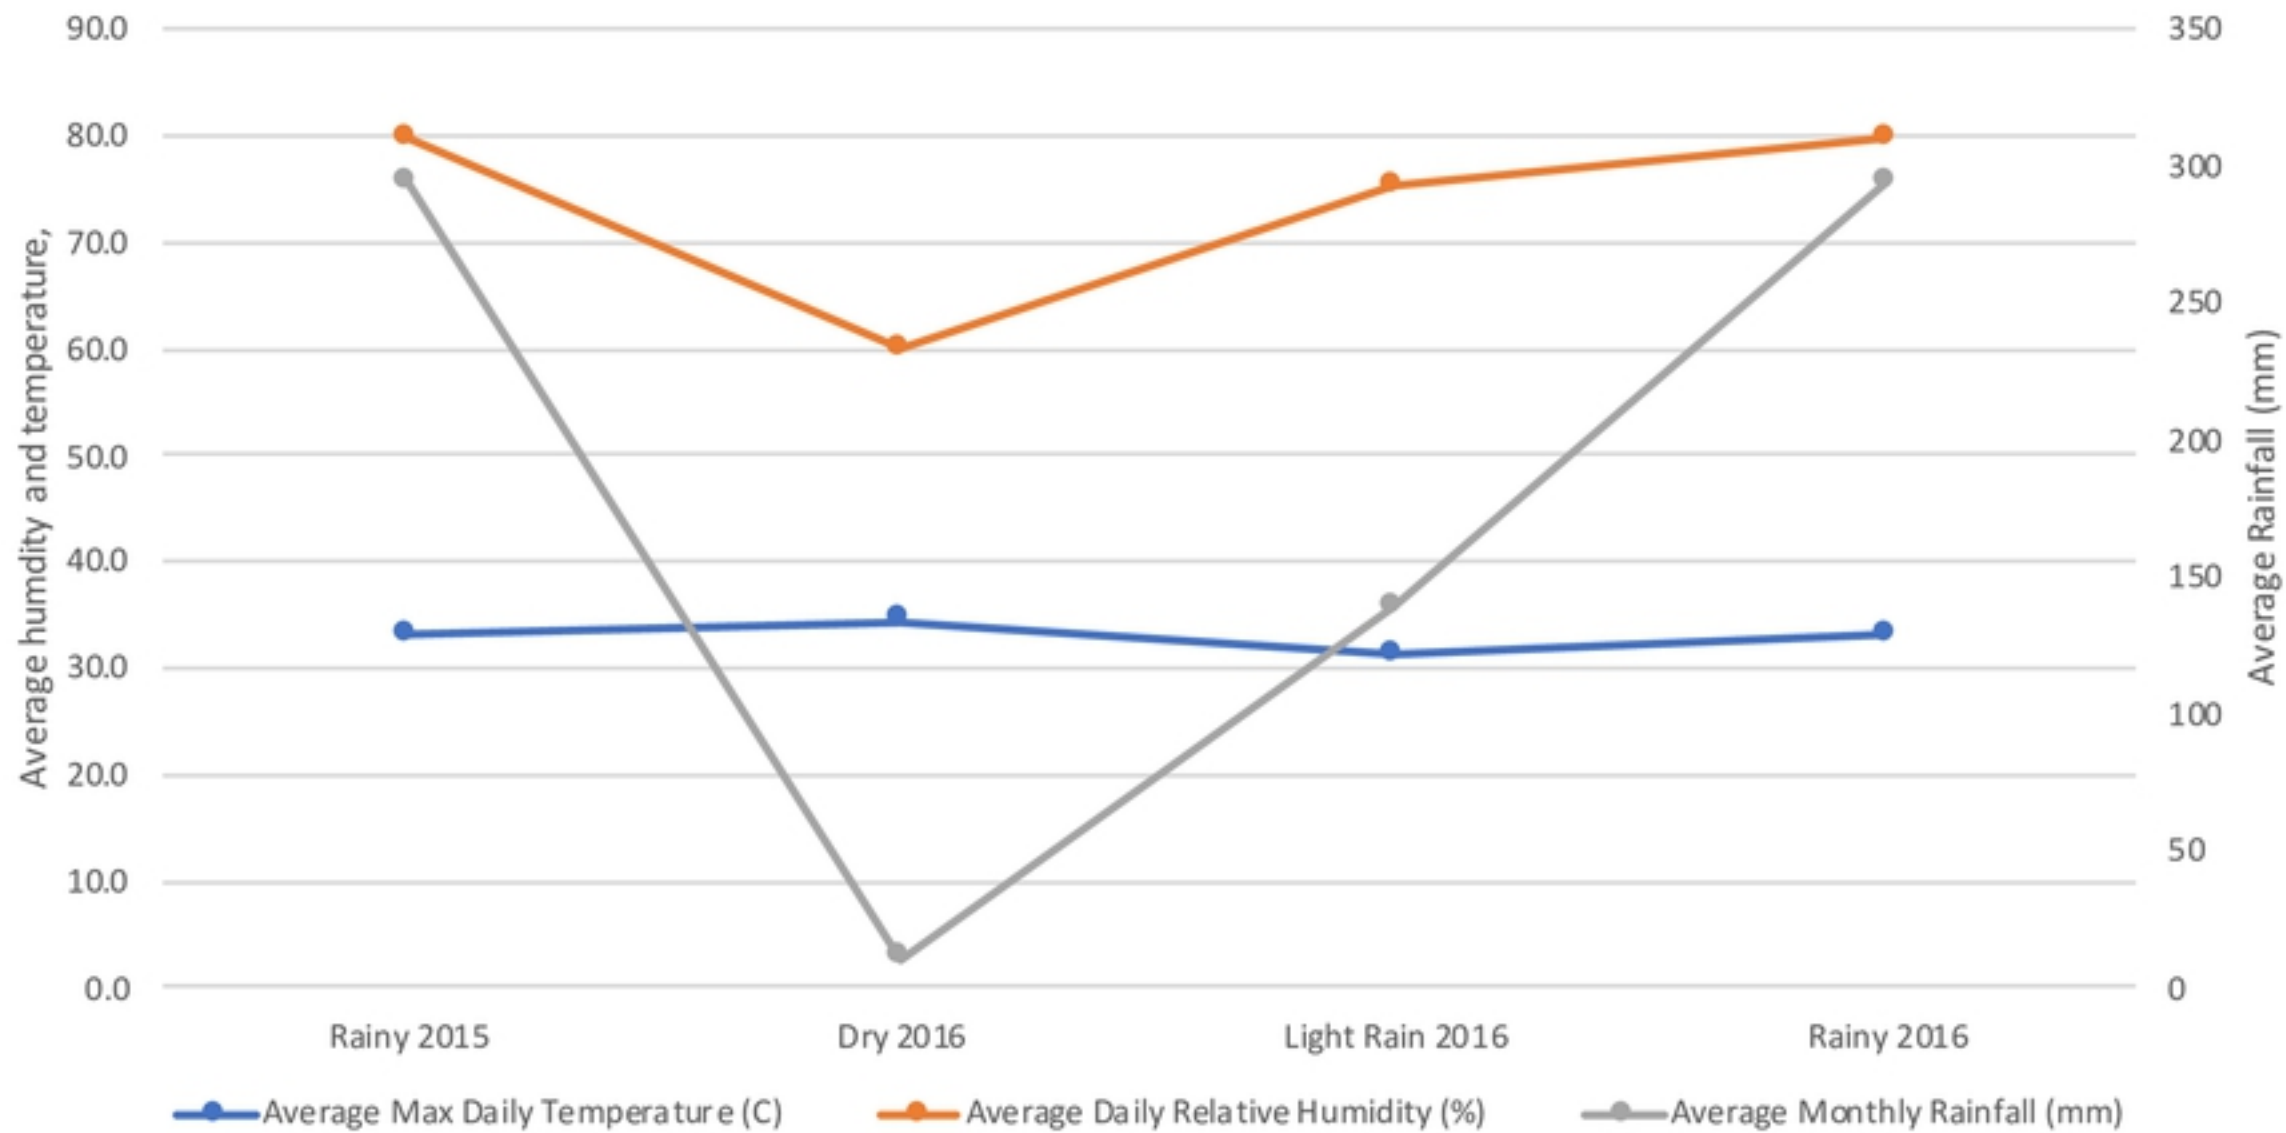

Figure 5

Figure 3: box plots showing pupae per person by arm and season, October 2015 – October 2016

Average Pupae Per Person by Cluster

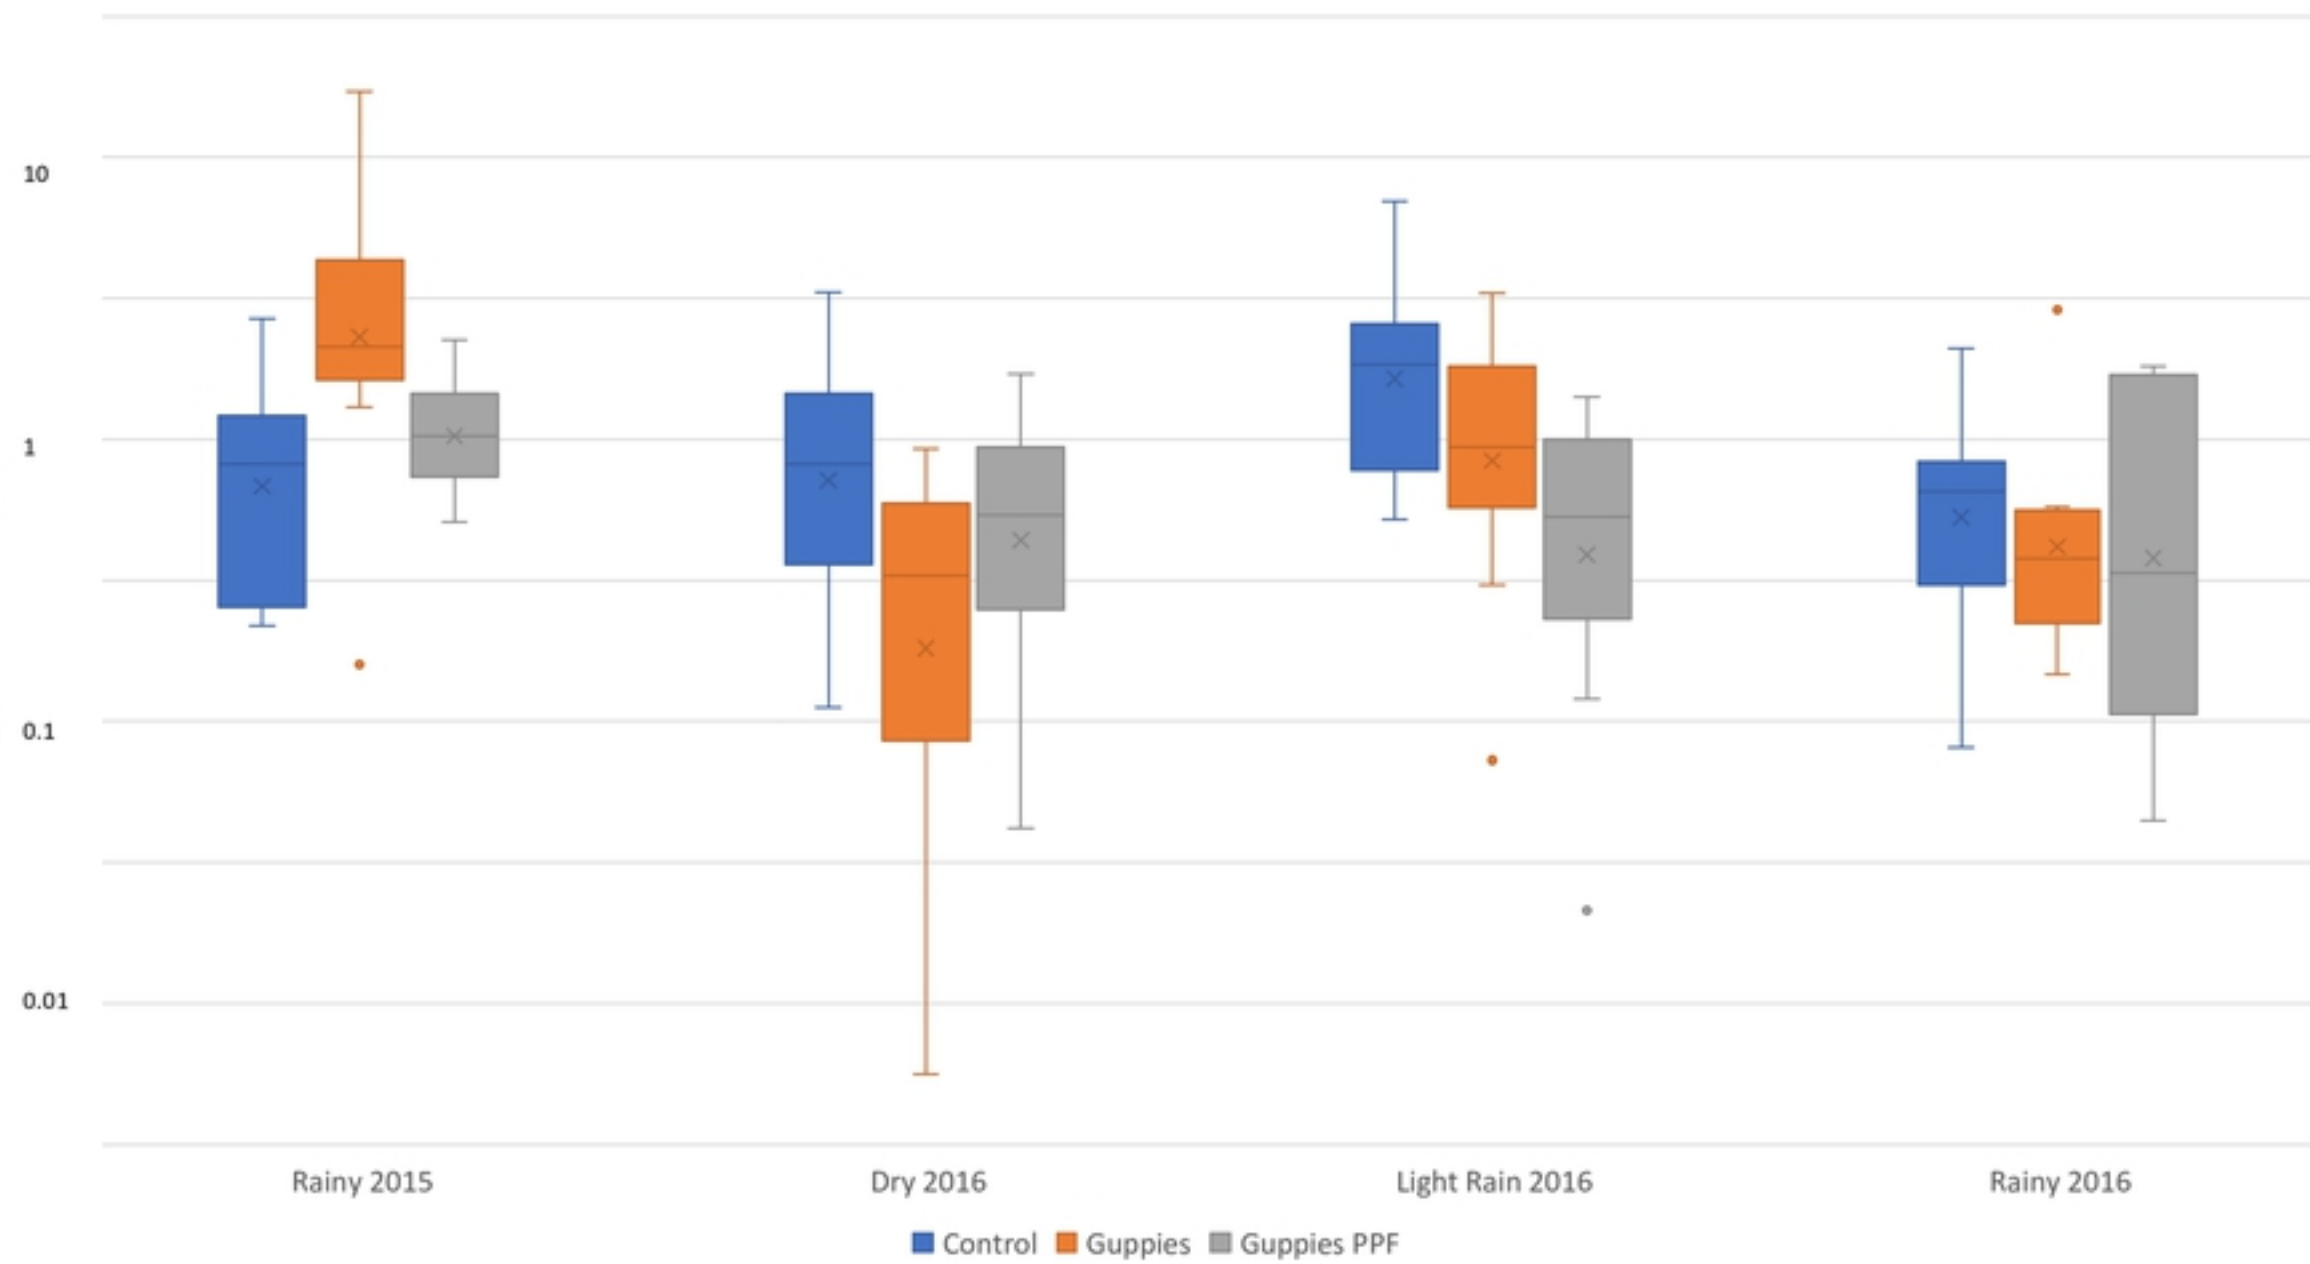

Figure 3

Figure 2. Box plots showing Breteau index by arm and season, October 2015 – October 2016

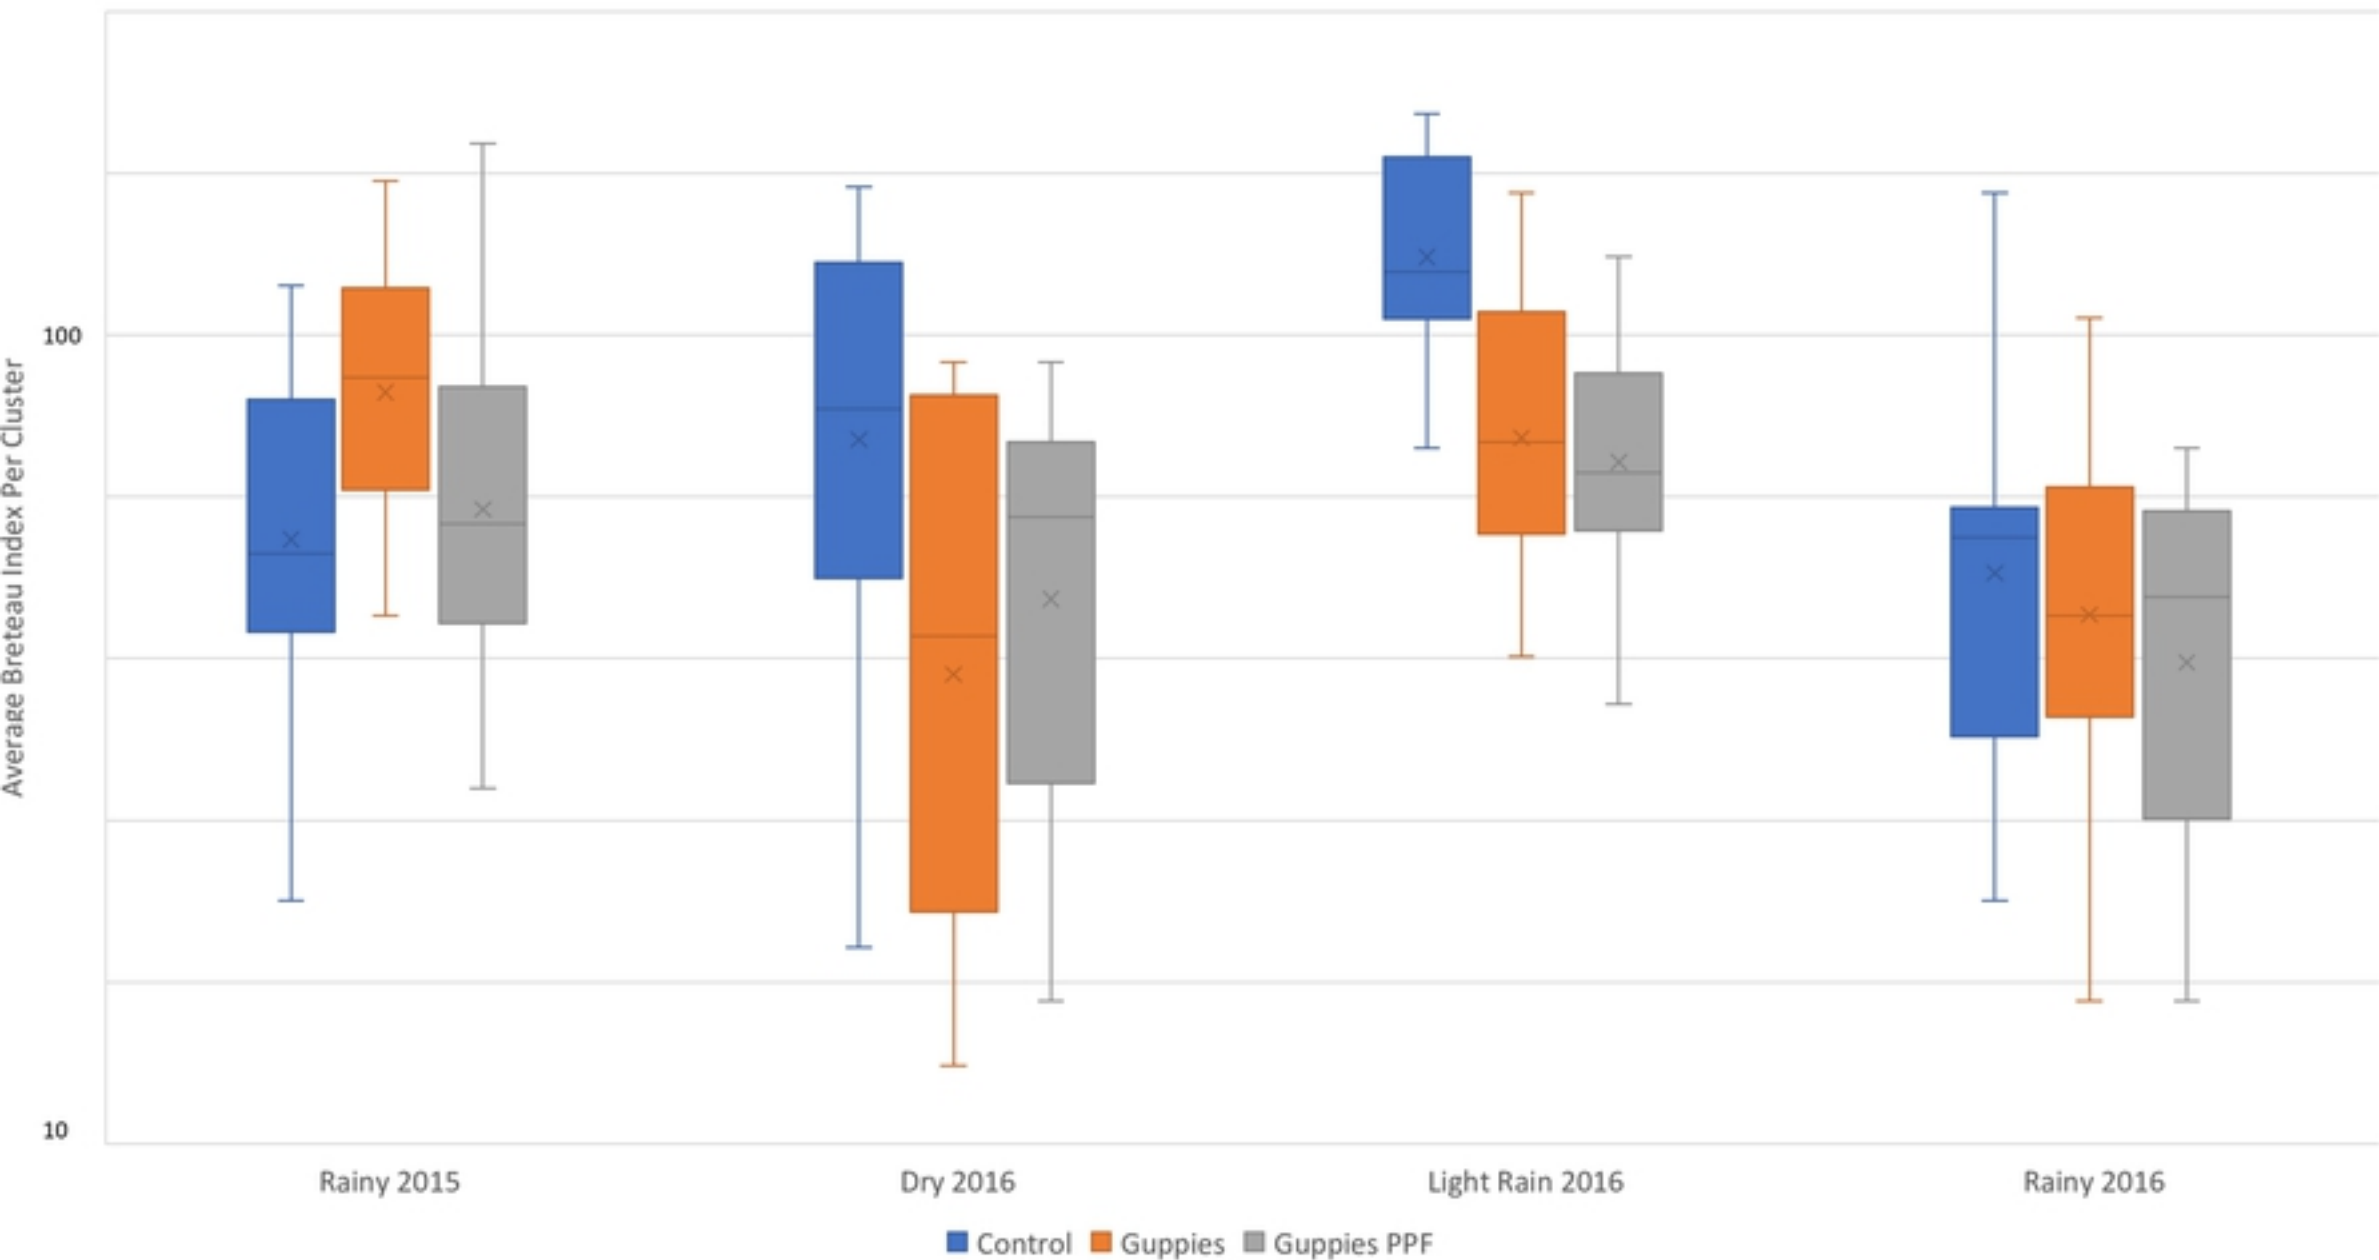

Figure 2

Figure 4: Coverage of guppies and PPF in intervention villages by month, November 2015 - September 2016

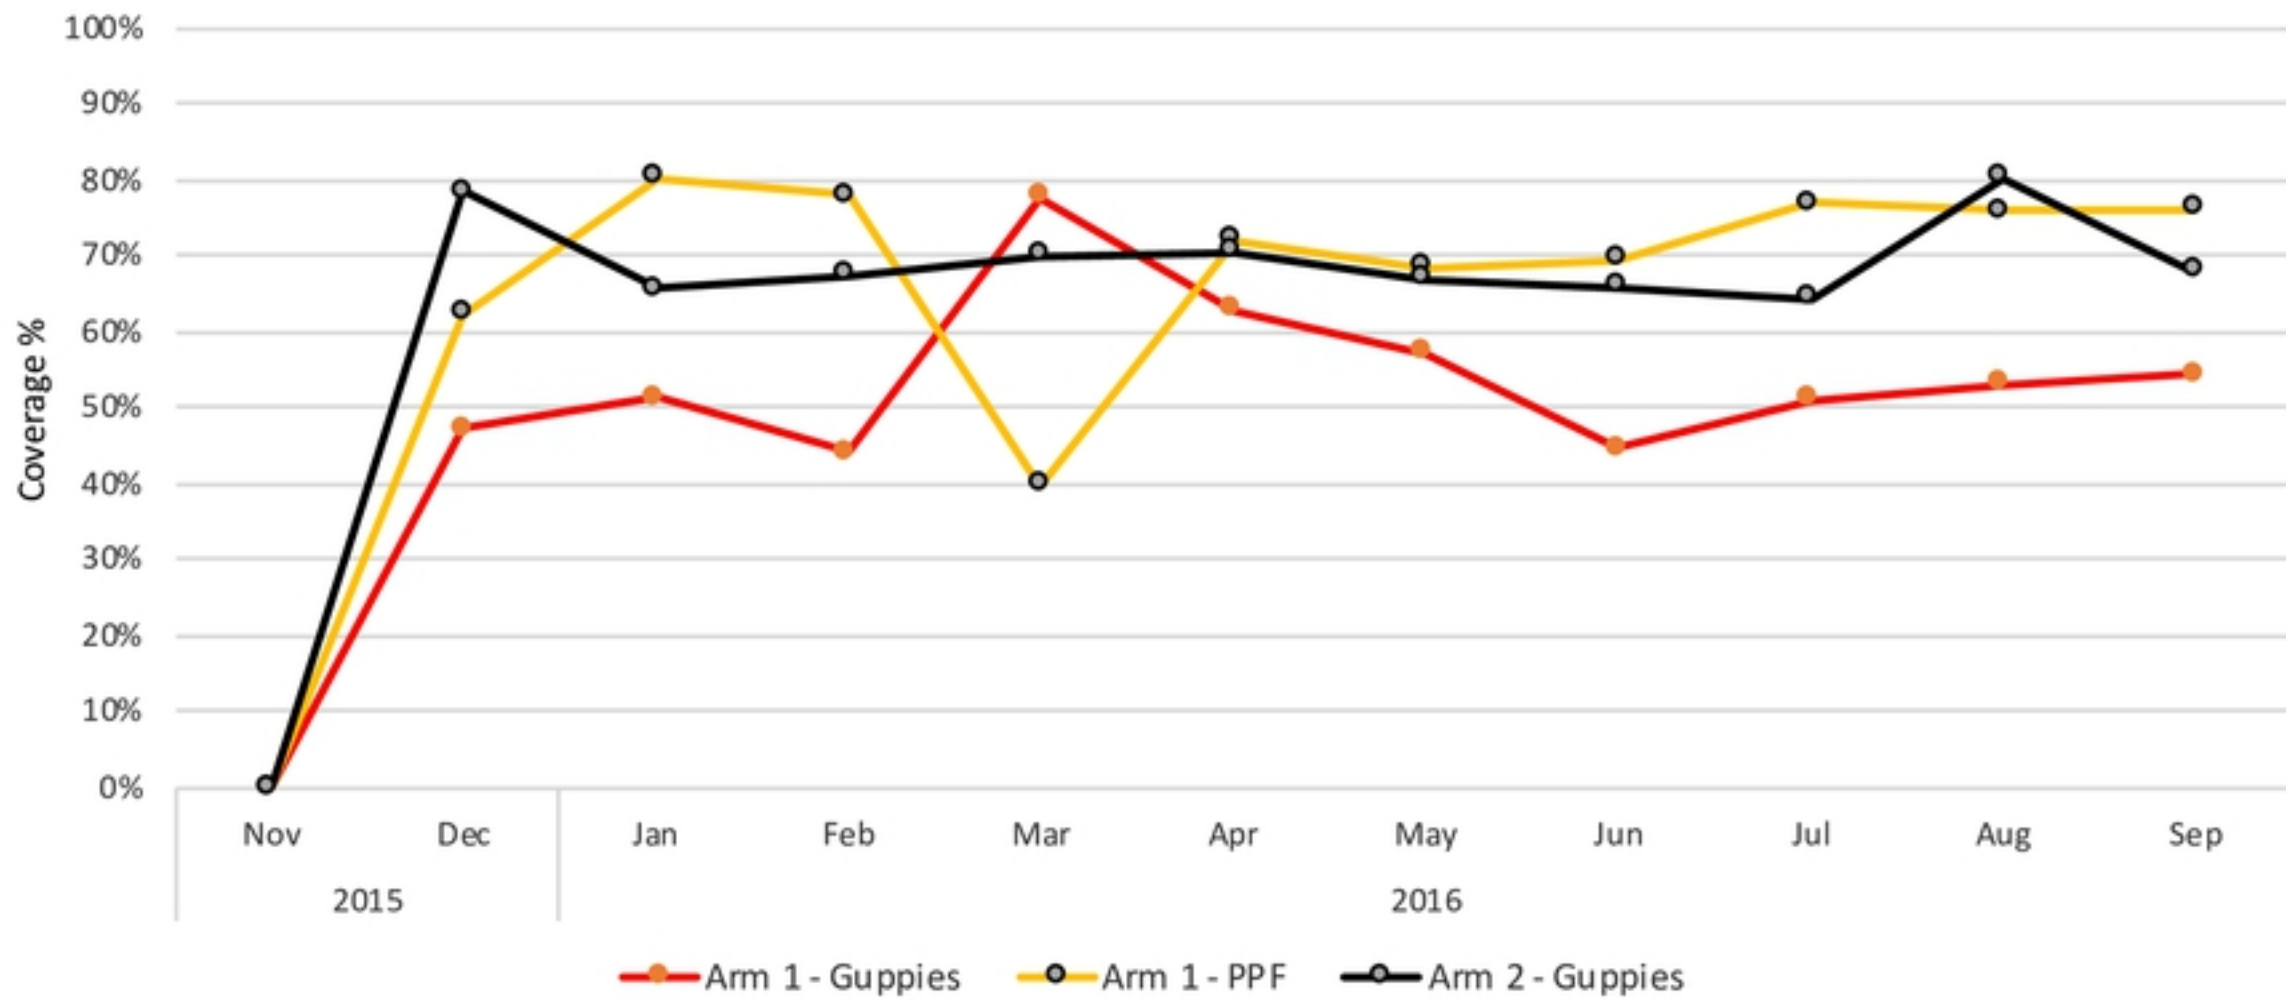

Figure 4

## CONSORT 2010 Flow Diagram for enrolment, follow up, and analysis of clusters

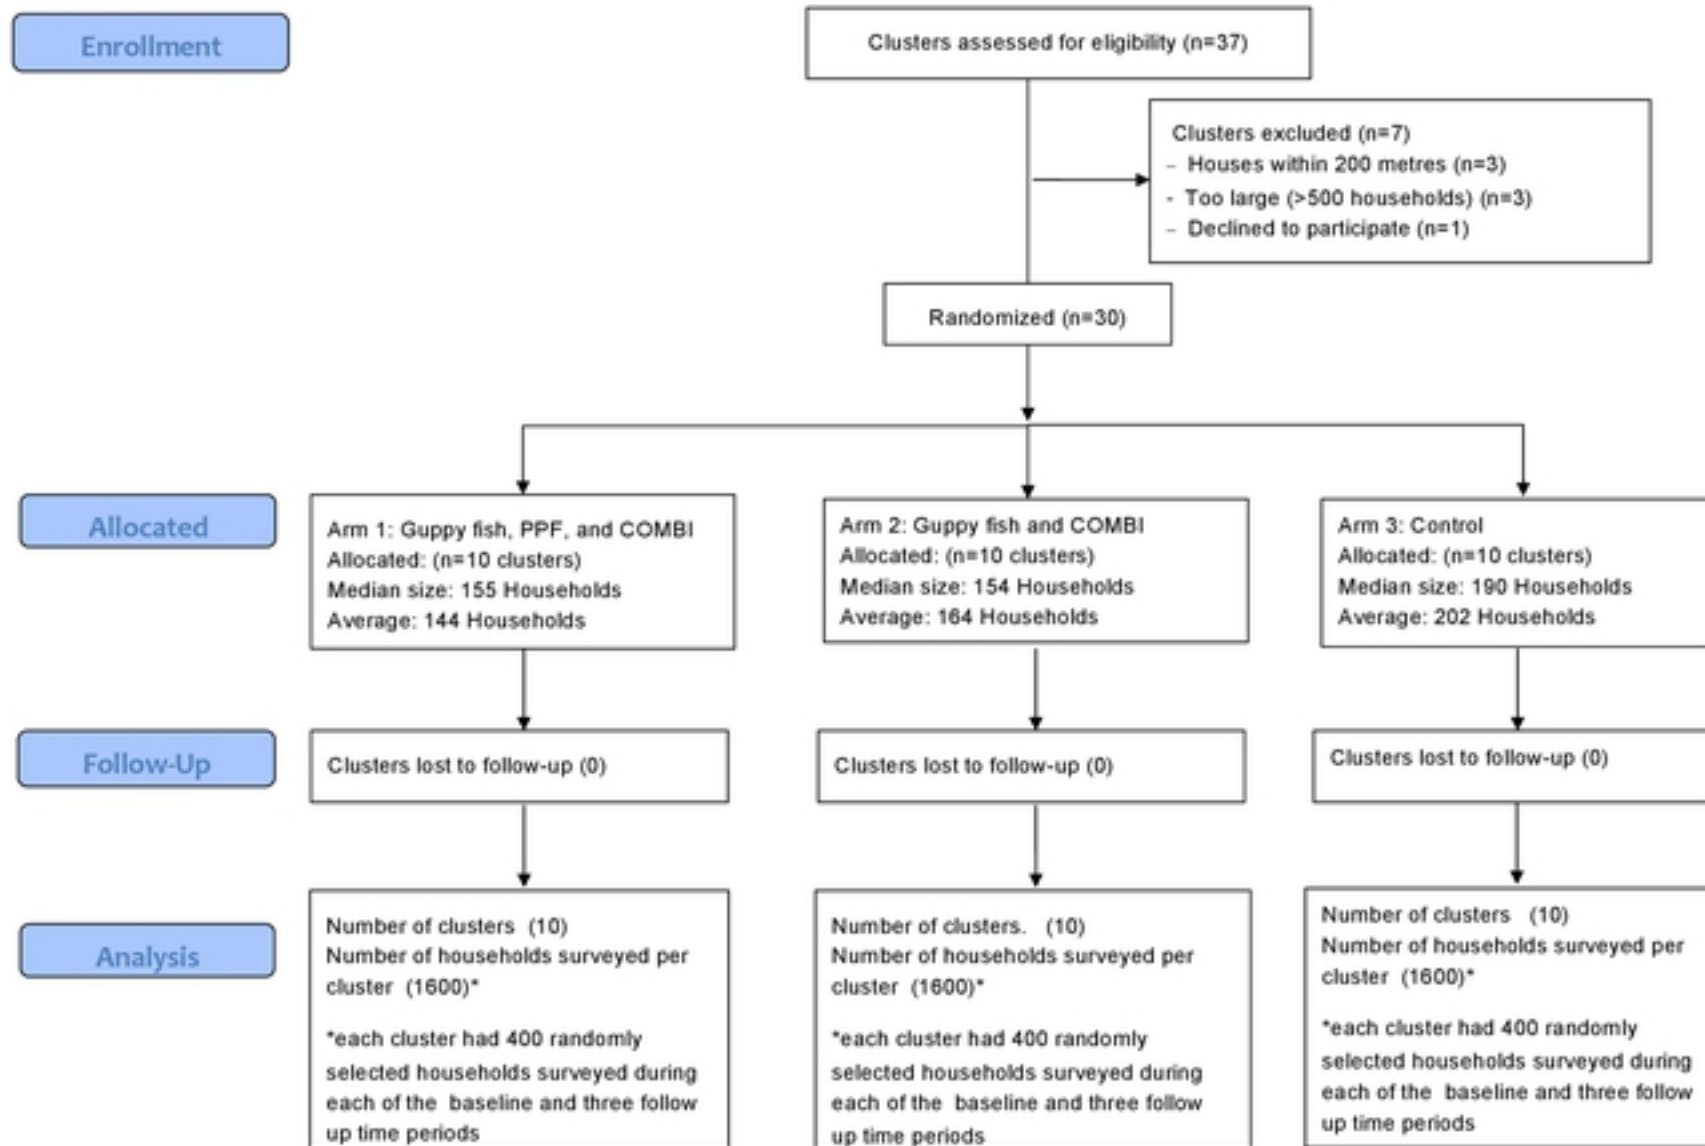

Source: https://www.biorxiv.org/content/10.1101/2020.05.15.097782v1.full.pdf
